# Supplementary material for: Comprehensive microRNA profiling in B-cells of human centenarians by massively parallel sequencing
Source: PubMed Central journal article supplement (PMC3563618; doi:10.1186/1471-2164-13-353), 2012-07-31
Supplement: 1471-2164-13-353-S1.pdf [file 1471-2164-13-353-S1.pdf]

Supplementary Table S1. Summary of read/sequence counts for miRNA analysis from lymphoblastoid cell lines from centenarians (n=3) and controls (n=3)

| Samples                          | CONTROLS  |            |            | CENTENARIANS |            |            |
|----------------------------------|-----------|------------|------------|--------------|------------|------------|
|                                  | LG879     | LG1654     | LG3632     | LG1041       | LG4797     | LG6503     |
| Total Reads                      | 5,001,231 | 5,507,871  | 3,397,339  | 3,416,386    | 5,221,462  | 4,390,079  |
| Poor Quality                     | -64,961   | -55,831    | -84,198    | -52,886      | -72,897    | -57,902    |
| Improper Size                    | -976,455  | -1,016,172 | -1,130,632 | -1,420,603   | -1,288,747 | -1,150,913 |
| Reads Meeting Quality and Size   | 3,959,815 | 4,435,868  | 2,182,509  | 1,942,897    | 3,859,818  | 3,181,264  |
| Unique Sequences                 | 276,916   | 254,709    | 151,861    | 184,573      | 226,592    | 235,747    |
| Unique Sequences in Clusters > 1 | 48,199    | 46,301     | 30,659     | 34,832       | 42,318     | 41,654     |
| miRNA/miRNA* identified          | 221/55    |            |            |              |            |            |
| Expanded Total miRNA abundance   | 2,559,586 | 3,023,318  | 1,327,913  | 1,033,023    | 2,553,821  | 1,990,772  |
| Ratio of miRNA to Total Reads    | 51.18%    | 54.89%     | 39.09%     | 30.24%       | 48.91%     | 45.35%     |
