# Supplementary material for: Comprehensive microRNA profiling in B-cells of human centenarians by massively parallel sequencing
Source: PubMed Central journal article supplement (PMC3563618; doi:10.1186/1471-2164-13-353), 2012-07-31
Supplement: 1471-2164-13-353-S2.pdf [file 1471-2164-13-353-S2.pdf]

Supplementary Table S2. Complete list of known (miRBase v 9) average miRNA read counts from lymphoblastoid cells from centenarians (n=3) and controls (n=3). All reads present in 50% or more samples with a read number greater than 10.

| miRNA          | Control | Centenarian | Fold Change(Centenarian/Control) |
|----------------|---------|-------------|----------------------------------|
| hsa-let-7a     | 356790  | 291190      | 0.816                            |
| hsa-let-7a*    | 36      | 32          | 0.898                            |
| hsa-let-7b     | 21231   | 15935       | 0.751                            |
| hsa-let-7b*    | 393     | 417         | 1.062                            |
| hsa-let-7c     | 356187  | 290682      | 0.816                            |
| hsa-let-7d     | 67492   | 46456       | 0.688                            |
| hsa-let-7d*    | 50      | 43          | 0.853                            |
| hsa-let-7e     | 2221    | 1430        | 0.644                            |
| hsa-let-7f     | 1023496 | 868104      | 0.848                            |
| hsa-let-7f-1*  | 16      | 12          | 0.771                            |
| hsa-let-7g     | 85634   | 92025       | 1.075                            |
| hsa-let-7i     | 33043   | 37673       | 1.140                            |
| hsa-miR-1      | 66      | 53          | 0.803                            |
| hsa-miR-101    | 5720    | 5899        | 1.031                            |
| hsa-miR-103    | 195210  | 179652      | 0.920                            |
| hsa-miR-103-as | 195210  | 179652      | 0.920                            |
| hsa-miR-106a   | 1782    | 2391        | 1.342                            |
| hsa-miR-106b   | 759     | 725         | 0.955                            |
| hsa-miR-106b*  | 214     | 209         | 0.974                            |
| hsa-miR-107    | 195084  | 179541      | 0.920                            |
| hsa-miR-10a    | 987     | 1630        | 1.652                            |
| hsa-miR-122    | 6       | 34          | 5.368                            |
| hsa-miR-1255a  | 171     | 227         | 1.326                            |
| hsa-miR-1255b  | 171     | 227         | 1.326                            |
| hsa-miR-1259   | 35      | 70          | 1.981                            |
| hsa-miR-1270   | 71      | 50          | 0.708                            |
| hsa-miR-1271   | 23      | 30          | 1.319                            |
| hsa-miR-1277   | 16      | 22          | 1.327                            |
| hsa-miR-1278   | 44      | 51          | 1.150                            |
| hsa-miR-128    | 2056    | 1720        | 0.836                            |
| hsa-miR-1301   | 54      | 55          | 1.012                            |
| hsa-miR-1304   | 33      | 23          | 0.707                            |
| hsa-miR-1307   | 1720    | 1925        | 1.119                            |
| hsa-miR-130a   | 107     | 129         | 1.199                            |
| hsa-miR-130b   | 1089    | 932         | 0.856                            |
| hsa-miR-130b*  | 36      | 40          | 1.110                            |

|                        |       |        |       |
|------------------------|-------|--------|-------|
| <b>hsa-miR-132</b>     | 47    | 34     | 0.723 |
| <b>hsa-miR-132*</b>    | 38    | 29     | 0.763 |
| <b>hsa-miR-138</b>     | 309   | 236    | 0.765 |
| <b>hsa-miR-140-3p</b>  | 50679 | 49313  | 0.973 |
| <b>hsa-miR-142-3p</b>  | 1010  | 1314   | 1.300 |
| <b>hsa-miR-142-5p</b>  | 26831 | 24930  | 0.929 |
| <b>hsa-miR-146a</b>    | 28517 | 21389  | 0.750 |
| <b>hsa-miR-146b-3p</b> | 18    | 16     | 0.873 |
| <b>hsa-miR-146b-5p</b> | 28223 | 21324  | 0.756 |
| <b>hsa-miR-148a</b>    | 3866  | 8528   | 2.206 |
| <b>hsa-miR-148a*</b>   | 113   | 219    | 1.935 |
| <b>hsa-miR-148b</b>    | 378   | 469    | 1.241 |
| <b>hsa-miR-148b*</b>   | 37    | 46     | 1.243 |
| <b>hsa-miR-150</b>     | 28    | 18     | 0.635 |
| <b>hsa-miR-150*</b>    | 53    | 36     | 0.681 |
| <b>hsa-miR-151-3p</b>  | 1505  | 451    | 0.299 |
| <b>hsa-miR-151-5p</b>  | 86    | 27     | 0.311 |
| <b>hsa-miR-152</b>     | 510   | 565    | 1.108 |
| <b>hsa-miR-155</b>     | 70851 | 109615 | 1.547 |
| <b>hsa-miR-155*</b>    | 687   | 826    | 1.203 |
| <b>hsa-miR-15a</b>     | 241   | 231    | 0.956 |
| <b>hsa-miR-15b</b>     | 814   | 1017   | 1.249 |
| <b>hsa-miR-15b*</b>    | 176   | 248    | 1.411 |
| <b>hsa-miR-16</b>      | 3207  | 3277   | 1.022 |
| <b>hsa-miR-16-2*</b>   | 283   | 381    | 1.344 |
| <b>hsa-miR-17</b>      | 1782  | 2391   | 1.342 |
| <b>hsa-miR-17*</b>     | 1420  | 1086   | 0.765 |
| <b>hsa-miR-181a</b>    | 11197 | 19438  | 1.736 |
| <b>hsa-miR-181a*</b>   | 209   | 547    | 2.617 |
| <b>hsa-miR-181a-2*</b> | 297   | 449    | 1.515 |
| <b>hsa-miR-181b</b>    | 8194  | 13044  | 1.592 |
| <b>hsa-miR-181c</b>    | 51    | 103    | 2.026 |
| <b>hsa-miR-181d</b>    | 889   | 1321   | 1.486 |
| <b>hsa-miR-185</b>     | 6798  | 5605   | 0.825 |
| <b>hsa-miR-185*</b>    | 25    | 25     | 1.027 |
| <b>hsa-miR-186</b>     | 1178  | 1447   | 1.228 |
| <b>hsa-miR-18a</b>     | 58    | 70     | 1.201 |
| <b>hsa-miR-18a*</b>    | 12    | 18     | 1.543 |
| <b>hsa-miR-18b</b>     | 58    | 70     | 1.201 |
| <b>hsa-miR-191</b>     | 35275 | 24926  | 0.707 |

|                         |       |        |       |
|-------------------------|-------|--------|-------|
| <b>hsa-miR-192</b>      | 2375  | 4585   | 1.930 |
| <b>hsa-miR-193b</b>     | 736   | 1104   | 1.500 |
| <b>hsa-miR-193b*</b>    | 2310  | 2236   | 0.968 |
| <b>hsa-miR-197</b>      | 30    | 36     | 1.187 |
| <b>hsa-miR-1974</b>     | 1505  | 4726   | 3.140 |
| <b>hsa-miR-1975</b>     | 551   | 1176   | 2.134 |
| <b>hsa-miR-1977</b>     | 26    | 42     | 1.595 |
| <b>hsa-miR-1979</b>     | 1252  | 2301   | 1.837 |
| <b>hsa-miR-199a-3p</b>  | 69    | 77     | 1.115 |
| <b>hsa-miR-199b-3p</b>  | 69    | 77     | 1.115 |
| <b>hsa-miR-19a</b>      | 10    | 11     | 1.138 |
| <b>hsa-miR-19b</b>      | 288   | 323    | 1.122 |
| <b>hsa-miR-200c</b>     | 89    | 106    | 1.195 |
| <b>hsa-miR-20a</b>      | 645   | 1028   | 1.595 |
| <b>hsa-miR-20b</b>      | 102   | 369    | 3.621 |
| <b>hsa-miR-20b*</b>     | 106   | 236    | 2.219 |
| <b>hsa-miR-21</b>       | 81191 | 112017 | 1.380 |
| <b>hsa-miR-21*</b>      | 843   | 2104   | 2.496 |
| <b>hsa-miR-210</b>      | 3702  | 3648   | 0.986 |
| <b>hsa-miR-2110</b>     | 16    | 10     | 0.592 |
| <b>hsa-miR-215</b>      | 2375  | 4585   | 1.930 |
| <b>hsa-miR-219-1-3p</b> | 8     | 8      | 1.042 |
| <b>hsa-miR-22</b>       | 538   | 737    | 1.371 |
| <b>hsa-miR-22*</b>      | 55    | 63     | 1.159 |
| <b>hsa-miR-221</b>      | 13870 | 21440  | 1.546 |
| <b>hsa-miR-221*</b>     | 2006  | 2218   | 1.106 |
| <b>hsa-miR-222</b>      | 5227  | 6609   | 1.265 |
| <b>hsa-miR-223</b>      | 90    | 149    | 1.658 |
| <b>hsa-miR-223*</b>     | 193   | 600    | 3.103 |
| <b>hsa-miR-23a</b>      | 4925  | 4055   | 0.823 |
| <b>hsa-miR-23a*</b>     | 38    | 23     | 0.600 |
| <b>hsa-miR-23b</b>      | 4921  | 4055   | 0.824 |
| <b>hsa-miR-23b*</b>     | 59    | 53     | 0.888 |
| <b>hsa-miR-24</b>       | 1090  | 777    | 0.712 |
| <b>hsa-miR-25</b>       | 37897 | 46760  | 1.234 |
| <b>hsa-miR-25*</b>      | 3303  | 3672   | 1.112 |
| <b>hsa-miR-26a</b>      | 3011  | 2625   | 0.872 |
| <b>hsa-miR-26b</b>      | 3220  | 3310   | 1.028 |
| <b>hsa-miR-27a</b>      | 1033  | 1020   | 0.987 |
| <b>hsa-miR-27a*</b>     | 26    | 36     | 1.354 |

|                       |       |       |       |
|-----------------------|-------|-------|-------|
| <b>hsa-miR-27b</b>    | 1033  | 1020  | 0.987 |
| <b>hsa-miR-27b*</b>   | 36    | 57    | 1.578 |
| <b>hsa-miR-296-3p</b> | 111   | 60    | 0.539 |
| <b>hsa-miR-29a</b>    | 25318 | 25165 | 0.994 |
| <b>hsa-miR-29a*</b>   | 12    | 11    | 0.892 |
| <b>hsa-miR-29b</b>    | 2015  | 2382  | 1.182 |
| <b>hsa-miR-29b-1*</b> | 29    | 42    | 1.437 |
| <b>hsa-miR-29c</b>    | 2015  | 2382  | 1.182 |
| <b>hsa-miR-29c*</b>   | 8     | 9     | 1.080 |
| <b>hsa-miR-30a*</b>   | 4240  | 5583  | 1.317 |
| <b>hsa-miR-30b</b>    | 444   | 734   | 1.652 |
| <b>hsa-miR-30b*</b>   | 99    | 141   | 1.432 |
| <b>hsa-miR-30c</b>    | 444   | 734   | 1.652 |
| <b>hsa-miR-30c-1*</b> | 67    | 65    | 0.980 |
| <b>hsa-miR-30d</b>    | 4039  | 5024  | 1.244 |
| <b>hsa-miR-30e</b>    | 1873  | 2150  | 1.148 |
| <b>hsa-miR-30e*</b>   | 4262  | 5621  | 1.319 |
| <b>hsa-miR-32</b>     | 11    | 11    | 0.970 |
| <b>hsa-miR-32*</b>    | 11    | 20    | 1.875 |
| <b>hsa-miR-320a</b>   | 66057 | 60988 | 0.923 |
| <b>hsa-miR-320b</b>   | 66033 | 60962 | 0.923 |
| <b>hsa-miR-320c</b>   | 66017 | 60936 | 0.923 |
| <b>hsa-miR-324-5p</b> | 36    | 33    | 0.925 |
| <b>hsa-miR-330-3p</b> | 3394  | 2691  | 0.793 |
| <b>hsa-miR-331-3p</b> | 1130  | 1289  | 1.141 |
| <b>hsa-miR-339-3p</b> | 406   | 428   | 1.054 |
| <b>hsa-miR-339-5p</b> | 116   | 106   | 0.917 |
| <b>hsa-miR-33a</b>    | 1524  | 1262  | 0.828 |
| <b>hsa-miR-33a*</b>   | 37    | 40    | 1.063 |
| <b>hsa-miR-33b</b>    | 15    | 15    | 1.000 |
| <b>hsa-miR-340</b>    | 125   | 114   | 0.914 |
| <b>hsa-miR-342-3p</b> | 1293  | 1018  | 0.787 |
| <b>hsa-miR-342-5p</b> | 131   | 199   | 1.522 |
| <b>hsa-miR-345</b>    | 20    | 76    | 3.847 |
| <b>hsa-miR-34a</b>    | 85    | 131   | 1.545 |
| <b>hsa-miR-34a*</b>   | 28    | 24    | 0.847 |
| <b>hsa-miR-34c-5p</b> | 24    | 21    | 0.849 |
| <b>hsa-miR-361-3p</b> | 96    | 112   | 1.167 |
| <b>hsa-miR-361-5p</b> | 102   | 196   | 1.912 |
| <b>hsa-miR-362-3p</b> | 19    | 13    | 0.696 |

|                        |       |       |       |
|------------------------|-------|-------|-------|
| <b>hsa-miR-363</b>     | 1577  | 3990  | 2.530 |
| <b>hsa-miR-363*</b>    | 61    | 279   | 4.549 |
| <b>hsa-miR-365</b>     | 689   | 1000  | 1.453 |
| <b>hsa-miR-374a</b>    | 106   | 154   | 1.461 |
| <b>hsa-miR-374a*</b>   | 511   | 484   | 0.947 |
| <b>hsa-miR-374b</b>    | 598   | 591   | 0.989 |
| <b>hsa-miR-374b*</b>   | 598   | 591   | 0.989 |
| <b>hsa-miR-375</b>     | 18    | 20    | 1.113 |
| <b>hsa-miR-378</b>     | 34251 | 32777 | 0.957 |
| <b>hsa-miR-421</b>     | 91    | 67    | 0.743 |
| <b>hsa-miR-423-3p</b>  | 1848  | 2354  | 1.274 |
| <b>hsa-miR-423-5p</b>  | 22293 | 21119 | 0.947 |
| <b>hsa-miR-424</b>     | 96    | 52    | 0.540 |
| <b>hsa-miR-424*</b>    | 140   | 90    | 0.644 |
| <b>hsa-miR-425</b>     | 795   | 825   | 1.038 |
| <b>hsa-miR-425*</b>    | 103   | 75    | 0.727 |
| <b>hsa-miR-454</b>     | 13    | 42    | 3.231 |
| <b>hsa-miR-484</b>     | 38    | 44    | 1.157 |
| <b>hsa-miR-486-3p</b>  | 241   | 344   | 1.425 |
| <b>hsa-miR-486-5p</b>  | 241   | 344   | 1.425 |
| <b>hsa-miR-500*</b>    | 64    | 129   | 2.026 |
| <b>hsa-miR-501-3p</b>  | 20    | 25    | 1.230 |
| <b>hsa-miR-502-3p</b>  | 64    | 129   | 2.026 |
| <b>hsa-miR-503</b>     | 107   | 76    | 0.709 |
| <b>hsa-miR-505*</b>    | 124   | 110   | 0.892 |
| <b>hsa-miR-532-3p</b>  | 37    | 36    | 0.991 |
| <b>hsa-miR-532-5p</b>  | 461   | 411   | 0.892 |
| <b>hsa-miR-542-3p</b>  | 18    | 11    | 0.642 |
| <b>hsa-miR-548a-3p</b> | 26    | 29    | 1.103 |
| <b>hsa-miR-548b-5p</b> | 23    | 25    | 1.086 |
| <b>hsa-miR-548d-5p</b> | 23    | 25    | 1.086 |
| <b>hsa-miR-548e</b>    | 246   | 251   | 1.019 |
| <b>hsa-miR-548j</b>    | 22    | 24    | 1.092 |
| <b>hsa-miR-548k</b>    | 48    | 47    | 0.986 |
| <b>hsa-miR-551b</b>    | 48    | 70    | 1.451 |
| <b>hsa-miR-551b*</b>   | 20    | 34    | 1.729 |
| <b>hsa-miR-574-3p</b>  | 15    | 21    | 1.455 |
| <b>hsa-miR-576-3p</b>  | 35    | 37    | 1.057 |
| <b>hsa-miR-576-5p</b>  | 73    | 116   | 1.596 |
| <b>hsa-miR-589</b>     | 21    | 18    | 0.859 |

|                       |       |       |       |
|-----------------------|-------|-------|-------|
| <b>hsa-miR-590-5p</b> | 26    | 21    | 0.818 |
| <b>hsa-miR-598</b>    | 163   | 183   | 1.123 |
| <b>hsa-miR-625</b>    | 810   | 578   | 0.714 |
| <b>hsa-miR-625*</b>   | 810   | 578   | 0.714 |
| <b>hsa-miR-629</b>    | 66    | 105   | 1.596 |
| <b>hsa-miR-641</b>    | 63    | 67    | 1.064 |
| <b>hsa-miR-642</b>    | 133   | 173   | 1.295 |
| <b>hsa-miR-651</b>    | 22    | 30    | 1.343 |
| <b>hsa-miR-652</b>    | 67    | 61    | 0.901 |
| <b>hsa-miR-660</b>    | 47    | 70    | 1.482 |
| <b>hsa-miR-664</b>    | 31    | 41    | 1.337 |
| <b>hsa-miR-664*</b>   | 274   | 272   | 0.990 |
| <b>hsa-miR-7</b>      | 490   | 659   | 1.345 |
| <b>hsa-miR-7-1*</b>   | 64    | 85    | 1.328 |
| <b>hsa-miR-744</b>    | 600   | 533   | 0.887 |
| <b>hsa-miR-766</b>    | 163   | 128   | 0.787 |
| <b>hsa-miR-769-5p</b> | 14    | 23    | 1.659 |
| <b>hsa-miR-874</b>    | 26    | 29    | 1.128 |
| <b>hsa-miR-877</b>    | 67    | 51    | 0.760 |
| <b>hsa-miR-886-3p</b> | 623   | 763   | 1.225 |
| <b>hsa-miR-886-5p</b> | 2668  | 3453  | 1.294 |
| <b>hsa-miR-9</b>      | 114   | 210   | 1.845 |
| <b>hsa-miR-9*</b>     | 35    | 61    | 1.769 |
| <b>hsa-miR-92a</b>    | 11999 | 14291 | 1.191 |
| <b>hsa-miR-92a-1*</b> | 1853  | 1616  | 0.872 |
| <b>hsa-miR-92a-2*</b> | 37    | 41    | 1.099 |
| <b>hsa-miR-92b</b>    | 145   | 126   | 0.869 |
| <b>hsa-miR-92b*</b>   | 33    | 82    | 2.475 |
| <b>hsa-miR-93</b>     | 2685  | 3045  | 1.134 |
| <b>hsa-miR-93*</b>    | 7     | 15    | 2.190 |
| <b>hsa-miR-941</b>    | 163   | 238   | 1.455 |
| <b>hsa-miR-944</b>    | 77    | 87    | 1.125 |
| <b>hsa-miR-98</b>     | 1092  | 1229  | 1.125 |
| <b>hsa-miR-99a</b>    | 118   | 59    | 0.499 |
| <b>hsa-miR-99b</b>    | 32    | 92    | 2.845 |
