# Supplementary material for: Comprehensive microRNA profiling in B-cells of human centenarians by massively parallel sequencing
Source: PubMed Central journal article supplement (PMC3563618; doi:10.1186/1471-2164-13-353), 2012-07-31
Supplement: 1471-2164-13-353-S3.pdf [file 1471-2164-13-353-S3.pdf]

Supplementary Table S3: Sequencing identified isomiRs from  
B-Cells of Centenarians and Controls

| miRNA       | Sequence                |
|-------------|-------------------------|
| hsa-let-7a  | TGAGGTAGTAGGTTGTATAGTT  |
| hsa-let-7a  | TGAGGTAGTAGGTTGTATAGTTA |
| hsa-let-7a  | TGAGGTAGTAGGTTGTATAGT   |
| hsa-let-7a  | TGAGGTAGTAGGTTGTATAGTTT |
| hsa-let-7a  | TGAGGTAGTAGGTTGTATAGTA  |
| hsa-let-7a  | TGAGGTAGTAGGTTGTATAGTTG |
| hsa-let-7a  | TGAGGTAGTAGGTTGTATAGTAA |
| hsa-let-7a  | TGAGGTAGTAGGTTGTATAGTG  |
| hsa-let-7a  | TGAGGTAGTAGGTTGTATAGTC  |
| hsa-let-7a  | TGAGGTAGTAGGTTGTATAGTTC |
| hsa-let-7a  | TGAGGTAGTAGGTTGTATAGTAT |
| hsa-let-7a  | TGAGGTAGTAGGTTGTATAGTGA |
| hsa-let-7a  | TGAGGTAGTAGGTTGTATAGTCA |
| hsa-let-7a  | TGAGGTAGTAGGTTGTATAGTGT |
| hsa-let-7a  | TGAGGTAGTAGGTTGTATAGTAG |
| hsa-let-7a  | TGAGGTAGTAGGTTGTATAGTCG |
| hsa-let-7a  | TGAGGTAGTAGGTTGTATAGTCT |
| hsa-let-7a* | CTATACAATCTACTGTCTTTCT  |
| hsa-let-7a* | CTATACAATCTACTGTCTTT    |
| hsa-let-7a* | CTATACAATCTACTGTCTTTTT  |
| hsa-let-7a* | CTATACAATCTACTGTCTTTC   |
| hsa-let-7a* | CTATACAATCTACTGTCTTTT   |
| hsa-let-7a* | CTATACAATCTACTGTCTTTCA  |
| hsa-let-7b  | TGAGGTAGTAGGTTGTGTGGTT  |
| hsa-let-7b  | TGAGGTAGTAGGTTGTGTGGTTA |
| hsa-let-7b  | TGAGGTAGTAGGTTGTGTGGTTT |
| hsa-let-7b  | TGAGGTAGTAGGTTGTGTGGT   |
| hsa-let-7b  | TGAGGTAGTAGGTTGTGTGGTAA |
| hsa-let-7b  | TGAGGTAGTAGGTTGTGTGGTA  |
| hsa-let-7b  | TGAGGTAGTAGGTTGTGTGGTAT |
| hsa-let-7b  | TGAGGTAGTAGGTTGTGTGGTTG |
| hsa-let-7b  | TGAGGTAGTAGGTTGTGTGGTAG |
| hsa-let-7b  | TGAGGTAGTAGGTTGTGTGGTG  |
| hsa-let-7b  | TGAGGTAGTAGGTTGTGTGGTTC |
| hsa-let-7b  | TGAGGTAGTAGGTTGTGTGGTGA |
| hsa-let-7b  | TGAGGTAGTAGGTTGTGTGGTC  |
| hsa-let-7b  | TGAGGTAGTAGGTTGTGTGGTGT |
| hsa-let-7b  | TGAGGTAGTAGGTTGTGTGGTCA |
| hsa-let-7c  | TGAGGTAGTAGGTTGTATGGTT  |
| hsa-let-7c  | TGAGGTAGTAGGTTGTATGGTTA |
| hsa-let-7c  | TGAGGTAGTAGGTTGTATGGT   |
| hsa-let-7c  | TGAGGTAGTAGGTTGTATGGTTT |
| hsa-let-7c  | TGAGGTAGTAGGTTGTATGGTA  |

|             |                         |
|-------------|-------------------------|
| hsa-let-7c  | TGAGGTAGTAGGTTGTATGGTAA |
| hsa-let-7c  | TGAGGTAGTAGGTTGTATGGTTG |
| hsa-let-7c  | TGAGGTAGTAGGTTGTATGGTAT |
| hsa-let-7c  | TGAGGTAGTAGGTTGTATGGTC  |
| hsa-let-7d  | AGAGGTAGTAGGTTGCATAGTT  |
| hsa-let-7d  | AGAGGTAGTAGGTTGCATAGTTA |
| hsa-let-7d  | AGAGGTAGTAGGTTGCATAGT   |
| hsa-let-7d  | AGAGGTAGTAGGTTGCATAGTTT |
| hsa-let-7d  | AGAGGTAGTAGGTTGCATAGTA  |
| hsa-let-7d  | AGAGGTAGTAGGTTGCATAGTTG |
| hsa-let-7d  | AGAGGTAGTAGGTTGCATAGTAA |
| hsa-let-7d  | AGAGGTAGTAGGTTGCATAGTG  |
| hsa-let-7d  | AGAGGTAGTAGGTTGCATAGTC  |
| hsa-let-7d  | AGAGGTAGTAGGTTGCATAGTAT |
| hsa-let-7d  | AGAGGTAGTAGGTTGCATAGTTC |
| hsa-let-7d  | AGAGGTAGTAGGTTGCATAGTGA |
| hsa-let-7d  | AGAGGTAGTAGGTTGCATAGTAG |
| hsa-let-7d  | AGAGGTAGTAGGTTGCATAGTCA |
| hsa-let-7d  | AGAGGTAGTAGGTTGCATAGTGT |
| hsa-let-7d* | CTATACGACCTGCTGCCTTCT   |
| hsa-let-7d* | CTATACGACCTGCTGCCTTTC   |
| hsa-let-7d* | CTATACGACCTGCTGCCTTTCA  |
| hsa-let-7e  | TGAGGTAGGAGGTTGTATAGTT  |
| hsa-let-7e  | TGAGGTAGGAGGTTGTATAGTTA |
| hsa-let-7e  | TGAGGTAGGAGGTTGTATAGT   |
| hsa-let-7e  | TGAGGTAGGAGGTTGTATAGTTT |
| hsa-let-7e  | TGAGGTAGGAGGTTGTATAGTTG |
| hsa-let-7e  | TGAGGTAGGAGGTTGTATAGTG  |
| hsa-let-7e  | TGAGGTAGGAGGTTGTATAGTA  |
| hsa-let-7e  | TGAGGTAGGAGGTTGTATAGTAA |
| hsa-let-7e  | TGAGGTAGGAGGTTGTATAGTC  |
| hsa-let-7e  | TGAGGTAGGAGGTTGTATAGTGA |
| hsa-let-7f  | TGAGGTAGTAGATTGTATAGTT  |
| hsa-let-7f  | TGAGGTAGTAGATTGTATAGTTA |
| hsa-let-7f  | TGAGGTAGTAGATTGTATAGT   |
| hsa-let-7f  | TGAGGTAGTAGATTGTATAGTTT |
| hsa-let-7f  | TGAGGTAGTAGATTGTATAGTA  |
| hsa-let-7f  | TGAGGTAGTAGATTGTATAGTTG |
| hsa-let-7f  | TGAGGTAGTAGATTGTATAGTAA |
| hsa-let-7f  | TGAGGTAGTAGATTGTATAGTG  |
| hsa-let-7f  | TGAGGTAGTAGATTGTATAGTC  |
| hsa-let-7f  | TGAGGTAGTAGATTGTATAGTTC |
| hsa-let-7f  | TGAGGTAGTAGATTGTATAGTCA |
| hsa-let-7f  | TGAGGTAGTAGATTGTATAGTAT |
| hsa-let-7f  | TGAGGTAGTAGATTGTATAGTGA |
| hsa-let-7f  | TGAGGTAGTAGATTGTATAGTGT |
| hsa-let-7f  | TGAGGTAGTAGATTGTATAGTAG |

|               |                          |
|---------------|--------------------------|
| hsa-let-7f    | TGAGGTAGTAGATTGTATAGTCT  |
| hsa-let-7f    | TGAGGTAGTAGATTGTATAGTCG  |
| hsa-let-7f-1* | CTATACAATCTATTGCCTTCCCT  |
| hsa-let-7f-1* | CTATACAATCTATTGCCTTCCA   |
| hsa-let-7f-1* | CTATACAATCTATTGCCTTCC    |
| hsa-let-7g    | TGAGGTAGTAGTTTGTACAGTT   |
| hsa-let-7g    | TGAGGTAGTAGTTTGTACAGTTA  |
| hsa-let-7g    | TGAGGTAGTAGTTTGTACAGT    |
| hsa-let-7g    | TGAGGTAGTAGTTTGTACAGTTT  |
| hsa-let-7g    | TGAGGTAGTAGTTTGTACAGTA   |
| hsa-let-7g    | TGAGGTAGTAGTTTGTACAGTTG  |
| hsa-let-7g    | TGAGGTAGTAGTTTGTACAGTAA  |
| hsa-let-7g    | TGAGGTAGTAGTTTGTACAGTG   |
| hsa-let-7g    | TGAGGTAGTAGTTTGTACAGTC   |
| hsa-let-7g    | TGAGGTAGTAGTTTGTACAGTTC  |
| hsa-let-7g    | TGAGGTAGTAGTTTGTACAGTAT  |
| hsa-let-7g    | TGAGGTAGTAGTTTGTACAGTGA  |
| hsa-let-7g    | TGAGGTAGTAGTTTGTACAGTCA  |
| hsa-let-7g*   | CTGTACAGGCCACTGCCTTGCT   |
| hsa-let-7i    | TGAGGTAGTAGTTTGTGCTGTT   |
| hsa-let-7i    | TGAGGTAGTAGTTTGTGCTGTTA  |
| hsa-let-7i    | TGAGGTAGTAGTTTGTGCTGT    |
| hsa-let-7i    | TGAGGTAGTAGTTTGTGCTGTTT  |
| hsa-let-7i    | TGAGGTAGTAGTTTGTGCTGTAA  |
| hsa-let-7i    | TGAGGTAGTAGTTTGTGCTGTGA  |
| hsa-let-7i    | TGAGGTAGTAGTTTGTGCTGTTG  |
| hsa-let-7i    | TGAGGTAGTAGTTTGTGCTGTG   |
| hsa-let-7i    | TGAGGTAGTAGTTTGTGCTGTAT  |
| hsa-let-7i    | TGAGGTAGTAGTTTGTGCTGTGTC |
| hsa-let-7i    | TGAGGTAGTAGTTTGTGCTGTAG  |
| hsa-let-7i    | TGAGGTAGTAGTTTGTGCTGTTC  |
| hsa-let-7i    | TGAGGTAGTAGTTTGTGCTGTGA  |
| hsa-let-7i    | TGAGGTAGTAGTTTGTGCTGTGT  |
| hsa-let-7i*   | CTGCGCAAGCTACTGCCTTGCT   |
| hsa-miR-1     | TGGAATGTAAGAAGTATGTAT    |
| hsa-miR-1     | TGGAATGTAAGAAGTATGTA     |
| hsa-miR-101   | TACAGTACTGTGATAACTGAA    |
| hsa-miR-101   | TACAGTACTGTGATAACTGAAG   |
| hsa-miR-101   | TACAGTACTGTGATAACTGAAA   |
| hsa-miR-101   | TACAGTACTGTGATAACTGA     |
| hsa-miR-101   | TACAGTACTGTGATAACTGAAGA  |
| hsa-miR-101   | TACAGTACTGTGATAACTGAAT   |
| hsa-miR-101   | TACAGTACTGTGATAACTGAAAA  |
| hsa-miR-101   | TACAGTACTGTGATAACTGAAGT  |
| hsa-miR-101   | TACAGTACTGTGATAACTGAT    |
| hsa-miR-101   | TACAGTACTGTGATAACTGATT   |
| hsa-miR-101   | TACAGTACTGTGATAACTGAAC   |

|                |                         |
|----------------|-------------------------|
| hsa-miR-103    | AGCAGCATTGTACAGGGCTATGA |
| hsa-miR-103    | AGCAGCATTGTACAGGGCTATG  |
| hsa-miR-103    | AGCAGCATTGTACAGGGCTATGT |
| hsa-miR-103    | AGCAGCATTGTACAGGGCTATGG |
| hsa-miR-103    | AGCAGCATTGTACAGGGCTATGC |
| hsa-miR-103-2* | AGCTTCTTTACAGTGCTGCCTTG |
| hsa-miR-106a   | AAAAGTGCTTACAGTGCAGGTAG |
| hsa-miR-106a   | AAAAGTGCTTACAGTGCAGGTA  |
| hsa-miR-106a   | AAAAGTGCTTACAGTGCAGGTAA |
| hsa-miR-106a   | AAAAGTGCTTACAGTGCAGGTAT |
| hsa-miR-106b   | TAAAGTGCTGACAGTGCAGATA  |
| hsa-miR-106b   | TAAAGTGCTGACAGTGCAGAT   |
| hsa-miR-106b   | TAAAGTGCTGACAGTGCAGATAA |
| hsa-miR-106b   | TAAAGTGCTGACAGTGCAGA    |
| hsa-miR-106b   | TAAAGTGCTGACAGTGCAGATAT |
| hsa-miR-106b   | TAAAGTGCTGACAGTGCAGATAG |
| hsa-miR-106b   | TAAAGTGCTGACAGTGCAGATT  |
| hsa-miR-106b   | TAAAGTGCTGACAGTGCAGAA   |
| hsa-miR-106b   | TAAAGTGCTGACAGTGCAGAGA  |
| hsa-miR-106b   | TAAAGTGCTGACAGTGCAGAAA  |
| hsa-miR-106b*  | CCGCACTGTGGTACTTGCTG    |
| hsa-miR-106b*  | CCGCACTGTGGTACTTGCTGA   |
| hsa-miR-106b*  | CCGCACTGTGGTACTTGCTGAA  |
| hsa-miR-106b*  | CCGCACTGTGGTACTTGCTGC   |
| hsa-miR-106b*  | CCGCACTGTGGTACTTGCTGT   |
| hsa-miR-107    | AGCAGCATTGTACAGGGCTATC  |
| hsa-miR-107    | AGCAGCATTGTACAGGGCTATCA |
| hsa-miR-107    | AGCAGCATTGTACAGGGCTATCT |
| hsa-miR-107    | AGCAGCATTGTACAGGGCTATCG |
| hsa-miR-10a    | TACCCTGTAGATCCGAATTTGT  |
| hsa-miR-10a    | TACCCTGTAGATCCGAATTTGTG |
| hsa-miR-10a    | TACCCTGTAGATCCGAATTTGTA |
| hsa-miR-10a    | TACCCTGTAGATCCGAATTTGTT |
| hsa-miR-10a*   | CAAATTCGTATCTAGGGGAAT   |
| hsa-miR-122    | TGGAGTGTGACAATGGTGTTT   |
| hsa-miR-1246   | AATGGATTTTTGGAGCAGGGA   |
| hsa-miR-1246   | AATGGATTTTTGGAGCAGGG    |
| hsa-miR-1246   | AATGGATTTTTGGAGCAGGGAG  |
| hsa-miR-1246   | AATGGATTTTTGGAGCAGGGAGA |
| hsa-miR-1246   | AATGGATTTTTGGAGCAGG     |
| hsa-miR-1246   | AATGGATTTTTGGAGCAGGGAA  |
| hsa-miR-1246   | AATGGATTTTTGGAGCAG      |
| hsa-miR-1246   | AATGGATTTTTGGAGCAGGGAAA |
| hsa-miR-1246   | AATGGATTTTTGGAGCAGGAA   |
| hsa-miR-1249   | ACGCCCTTCCCCCTTCTTCA    |
| hsa-miR-1254   | AGCCTGGAAGCTGGAGCCTGCAG |
| hsa-miR-1255a  | AGGATGAGCAAAGAAAGTAGATT |

|                 |                         |
|-----------------|-------------------------|
| hsa-miR-1255a   | AGGATGAGCAAAGAAAGTAGAT  |
| hsa-miR-1255a   | AGGATGAGCAAAGAAAGTAGATA |
| hsa-miR-1255b   | CGGATGAGCAAAGAAAGTGTT   |
| hsa-miR-1255b   | CGGATGAGCAAAGAAAGTGTTT  |
| hsa-miR-1255b   | CGGATGAGCAAAGAAAGTGTTA  |
| hsa-miR-1255b   | CGGATGAGCAAAGAAAGTGTT   |
| hsa-miR-1256    | AGGCATTGACTTCTACTAGCT   |
| hsa-miR-125a-5p | TCCCTGAGACCCTTTAACCTGTG |
| hsa-miR-125b    | TCCCTGAGACCCTAACTTGTGA  |
| hsa-miR-125b    | TCCCTGAGACCCTAACTTGTG   |
| hsa-miR-1260    | ATCCCACCTCTGCCACCA      |
| hsa-miR-1260b   | ATCCCACCTCTGCCACCA      |
| hsa-miR-1268    | CGGGCGTGGTGGTGGGG       |
| hsa-miR-1268    | CGGGCGTGGTGGTGGGGTGGG   |
| hsa-miR-1268    | CGGGCGTGGTGGTGGGG       |
| hsa-miR-1268    | CGGGCGTGGTGGTGGGGGA     |
| hsa-miR-1268    | CGGGCGTGGTGGTGGGGGAA    |
| hsa-miR-1270    | CTGGAGATATGGAAGAGCTGTGT |
| hsa-miR-1270    | CTGGAGATATGGAAGAGCTGTG  |
| hsa-miR-1270    | CTGGAGATATGGAAGAGCTGTGA |
| hsa-miR-1271    | CTTGGCACCTAGCAAGCACTCA  |
| hsa-miR-1271    | CTTGGCACCTAGCAAGCACTC   |
| hsa-miR-1273c   | GCGGACAAAACGAGACCCTGT   |
| hsa-miR-1273c   | GCGGACAAAACGAGACCCTGTCA |
| hsa-miR-1274a   | GTCCCTGTT CAGGCGCCA     |
| hsa-miR-1274b   | TCCCTGTT CGGGCGCCA      |
| hsa-miR-1274b   | TCCCTGTT CGGGCGCC       |
| hsa-miR-1274b   | TCCCTGTT CGGGCGCCC      |
| hsa-miR-1275    | GTGGGGGAGAGGCTGTA       |
| hsa-miR-1275    | GTGGGGGAGAGGCTGT        |
| hsa-miR-1275    | GTGGGGGAGAGGCTGTC       |
| hsa-miR-1275    | GTGGGGGAGAGGCTGTAA      |
| hsa-miR-1275    | GTGGGGGAGAGGCTGTAAA     |
| hsa-miR-1275    | GTGGGGGAGAGGCTGTCAA     |
| hsa-miR-1275    | GTGGGGGAGAGGCTGTCA      |
| hsa-miR-1275    | GTGGGGGAGAGGCTGTCCG     |
| hsa-miR-1275    | GTGGGGGAGAGGCTGTGCT     |
| hsa-miR-1275    | GTGGGGGAGAGGCTGTCAA     |
| hsa-miR-1275    | GTGGGGGAGAGGCTGTAAAA    |
| hsa-miR-1275    | GTGGGGGAGAGGCTGTCCG     |
| hsa-miR-1275    | GTGGGGGAGAGGCTGTGCTG    |
| hsa-miR-1275    | GTGGGGGAGAGGCTGTT       |
| hsa-miR-1275    | GTGGGGGAGAGGCTGTCAA     |
| hsa-miR-1275    | GTGGGGGAGAGGCTGTAAAA    |
| hsa-miR-1275    | GTGGGGGAGAGGCTGTCCGA    |
| hsa-miR-1275    | GTGGGGGAGAGGCTGTG       |
| hsa-miR-1275    | GTGGGGGAGAGGCTGTGCTA    |

|                |                         |
|----------------|-------------------------|
| hsa-miR-1275   | GTGGGGGAGAGGCTGTCCG     |
| hsa-miR-1275   | GTGGGGGAGAGGCTGTGA      |
| hsa-miR-1275   | GTGGGGGAGAGGCTGTCGAAA   |
| hsa-miR-1275   | GTGGGGGAGAGGCTGTCAAA    |
| hsa-miR-1275   | GTGGGGGAGAGGCTGTAT      |
| hsa-miR-1276   | TAAAGAGCCCTGTGGAGACA    |
| hsa-miR-1277   | TACGTAGATATATATGTATTTT  |
| hsa-miR-1277   | TACGTAGATATATATGTATTT   |
| hsa-miR-1278   | TAGTACTGTGCATATCATCTAT  |
| hsa-miR-1278   | TAGTACTGTGCATATCATCTA   |
| hsa-miR-128    | TCACAGTGAACCGGTCTCTTT   |
| hsa-miR-128    | TCACAGTGAACCGGTCTCTTTA  |
| hsa-miR-128    | TCACAGTGAACCGGTCTCTT    |
| hsa-miR-128    | TCACAGTGAACCGGTCTCTTTT  |
| hsa-miR-128    | TCACAGTGAACCGGTCTCTTA   |
| hsa-miR-128    | TCACAGTGAACCGGTCTCTTTAA |
| hsa-miR-128    | TCACAGTGAACCGGTCTCTTAA  |
| hsa-miR-128    | TCACAGTGAACCGGTCTCTTTTA |
| hsa-miR-128    | TCACAGTGAACCGGTCTCTTTTT |
| hsa-miR-128    | TCACAGTGAACCGGTCTCTTTAT |
| hsa-miR-128    | TCACAGTGAACCGGTCTCTTAT  |
| hsa-miR-128    | TCACAGTGAACCGGTCTCTTTG  |
| hsa-miR-128    | TCACAGTGAACCGGTCTCTTAAA |
| hsa-miR-128    | TCACAGTGAACCGGTCTCTTG   |
| hsa-miR-128    | TCACAGTGAACCGGTCTCTTAG  |
| hsa-miR-128    | TCACAGTGAACCGGTCTCTTAG  |
| hsa-miR-1280   | TCCCACCGCTGCCACCA       |
| hsa-miR-1285   | TCTGGGCAACAAAGTGAGACCT  |
| hsa-miR-1285   | TCTGGGCAACAAAGTGAGACC   |
| hsa-miR-1285   | TCTGGGCAACAAAGTGAGACCTT |
| hsa-miR-1285   | TCTGGGCAACAAAGTGAGACCTA |
| hsa-miR-1287   | TGCTGGATCAGTGTTGAGT     |
| hsa-miR-129-3p | AAGCCCTTACCCAAAAAGCAT   |
| hsa-miR-1294   | TGTGAGGTTGGCATTGTTGTCT  |
| hsa-miR-1294   | TGTGAGGTTGGCATTGTTGTC   |
| hsa-miR-129-5p | CTTTTTGCGGTCTGGGCTTGC   |
| hsa-miR-129-5p | CTTTTTGCGGTCTGGGCTTG    |
| hsa-miR-1299   | TTCTGGAATTCTGTGTGAGGGA  |
| hsa-miR-1301   | TTGCAGCTGCCTGGGAGTGACTT |
| hsa-miR-1304   | TTTGAGGCTACAGTGAGATGTG  |
| hsa-miR-1306   | ACGTTGGCTCTGGTGGTGATG   |
| hsa-miR-1306   | ACGTTGGCTCTGGTGGTGAT    |
| hsa-miR-1306   | ACGTTGGCTCTGGTGGTGATGT  |
| hsa-miR-1307   | ACTCGGCGTGGCGTCGGTCGTG  |
| hsa-miR-1307   | ACTCGGCGTGGCGTCGGTCGTGG |
| hsa-miR-1307   | ACTCGGCGTGGCGTCGGTCGT   |
| hsa-miR-1307   | ACTCGGCGTGGCGTCGGTCGTGT |

|                |                         |
|----------------|-------------------------|
| hsa-miR-1307   | ACTCGGCGTGGCGTCGGTCGTGA |
| hsa-miR-1307   | ACTCGGCGTGGCGTCGGTCGTT  |
| hsa-miR-1307   | ACTCGGCGTGGCGTCGGTCGTA  |
| hsa-miR-1307   | ACTCGGCGTGGCGTCGGTCGTAA |
| hsa-miR-1307   | ACTCGGCGTGGCGTCGGTCGTAT |
| hsa-miR-130a   | CAGTGCAATGTTAAAAGGGCAT  |
| hsa-miR-130a   | CAGTGCAATGTTAAAAGGGCAC  |
| hsa-miR-130a   | CAGTGCAATGTTAAAAGGGCATT |
| hsa-miR-130a   | CAGTGCAATGTTAAAAGGGCA   |
| hsa-miR-130a   | CAGTGCAATGTTAAAAGGGCATA |
| hsa-miR-130a   | CAGTGCAATGTTAAAAGGGCACA |
| hsa-miR-130a   | CAGTGCAATGTTAAAAGGGCACT |
| hsa-miR-130a   | CAGTGCAATGTTAAAAGGGCAA  |
| hsa-miR-130a   | CAGTGCAATGTTAAAAGGGCACC |
| hsa-miR-130b   | CAGTGCAATGATGAAAGGGCAT  |
| hsa-miR-130b   | CAGTGCAATGATGAAAGGGCA   |
| hsa-miR-130b   | CAGTGCAATGATGAAAGGGCAA  |
| hsa-miR-130b   | CAGTGCAATGATGAAAGGGCATT |
| hsa-miR-130b   | CAGTGCAATGATGAAAGGGCATA |
| hsa-miR-130b   | CAGTGCAATGATGAAAGGGCAAA |
| hsa-miR-130b   | CAGTGCAATGATGAAAGGGCAG  |
| hsa-miR-130b   | CAGTGCAATGATGAAAGGGCAAT |
| hsa-miR-130b   | CAGTGCAATGATGAAAGGGCATG |
| hsa-miR-130b*  | ACTCTTCCCTGTTGCACTACT   |
| hsa-miR-130b*  | ACTCTTCCCTGTTGCACTA     |
| hsa-miR-130b*  | ACTCTTCCCTGTTGCACTAC    |
| hsa-miR-132    | TAACAGTCTACAGCCATGGTCG  |
| hsa-miR-132    | TAACAGTCTACAGCCATGGTCGT |
| hsa-miR-132    | TAACAGTCTACAGCCATGGTC   |
| hsa-miR-132    | TAACAGTCTACAGCCATGGTCGA |
| hsa-miR-132*   | ACCGTGGCTTTCGATTGTTACT  |
| hsa-miR-138    | AGCTGGTGTGTGAATCAGGCCG  |
| hsa-miR-138    | AGCTGGTGTGTGAATCAGGCC   |
| hsa-miR-140-3p | TACCACAGGGTAGAACCACGGGA |
| hsa-miR-140-3p | TACCACAGGGTAGAACCACGGAC |
| hsa-miR-140-3p | TACCACAGGGTAGAACCACGGAA |
| hsa-miR-140-3p | TACCACAGGGTAGAACCACGGAT |
| hsa-miR-140-3p | TACCACAGGGTAGAACCACGG   |
| hsa-miR-140-3p | TACCACAGGGTAGAACCACGGAG |
| hsa-miR-140-3p | TACCACAGGGTAGAACCACG    |
| hsa-miR-140-3p | TACCACAGGGTAGAACCACGGT  |
| hsa-miR-140-3p | TACCACAGGGTAGAACCACGTA  |
| hsa-miR-140-3p | TACCACAGGGTAGAACCACGGTA |
| hsa-miR-140-3p | TACCACAGGGTAGAACCACGGCC |
| hsa-miR-140-3p | TACCACAGGGTAGAACCACGGTT |
| hsa-miR-140-3p | TACCACAGGGTAGAACCACGTAC |
| hsa-miR-140-3p | TACCACAGGGTAGAACCACGGC  |

|                 |                         |
|-----------------|-------------------------|
| hsa-miR-140-3p  | TACCACAGGGTAGAACCACGGCA |
| hsa-miR-140-3p  | TACCACAGGGTAGAACCACGTAA |
| hsa-miR-140-3p  | TACCACAGGGTAGAACCACGGG  |
| hsa-miR-140-3p  | TACCACAGGGTAGAACCACGA   |
| hsa-miR-140-3p  | TACCACAGGGTAGAACCACGT   |
| hsa-miR-140-3p  | TACCACAGGGTAGAACCACGAAA |
| hsa-miR-140-3p  | TACCACAGGGTAGAACCACGGTC |
| hsa-miR-140-5p  | CAGTGGTTTTACCCTATGGTAG  |
| hsa-miR-140-5p  | CAGTGGTTTTACCCTATGGTA   |
| hsa-miR-140-5p  | CAGTGGTTTTACCCTATGGTAA  |
| hsa-miR-140-5p  | CAGTGGTTTTACCCTATGGTAGA |
| hsa-miR-142-3p  | TGTAGTGTTCCTACTTTATGG   |
| hsa-miR-142-3p  | TGTAGTGTTCCTACTTTATGGA  |
| hsa-miR-142-3p  | TGTAGTGTTCCTACTTTATGGT  |
| hsa-miR-142-5p  | CATAAAGTAGAAAGCACTACT   |
| hsa-miR-142-5p  | CATAAAGTAGAAAGCACTACTA  |
| hsa-miR-142-5p  | CATAAAGTAGAAAGCACTAC    |
| hsa-miR-142-5p  | CATAAAGTAGAAAGCACTACTAA |
| hsa-miR-142-5p  | CATAAAGTAGAAAGCACTACTAT |
| hsa-miR-142-5p  | CATAAAGTAGAAAGCACTACA   |
| hsa-miR-142-5p  | CATAAAGTAGAAAGCACTACTAG |
| hsa-miR-142-5p  | CATAAAGTAGAAAGCACTACC   |
| hsa-miR-142-5p  | CATAAAGTAGAAAGCACTACG   |
| hsa-miR-142-5p  | CATAAAGTAGAAAGCACTACAA  |
| hsa-miR-142-5p  | CATAAAGTAGAAAGCACTACGA  |
| hsa-miR-142-5p  | CATAAAGTAGAAAGCACTACTT  |
| hsa-miR-143     | TGAGATGAAGCACTGTAGCT    |
| hsa-miR-146a    | TGAGAACTGAATCCATGGGTT   |
| hsa-miR-146a    | TGAGAACTGAATCCATGGGTTA  |
| hsa-miR-146a    | TGAGAACTGAATCCATGGGTTG  |
| hsa-miR-146a    | TGAGAACTGAATCCATGGGTTT  |
| hsa-miR-146a    | TGAGAACTGAATCCATGGGT    |
| hsa-miR-146a    | TGAGAACTGAATCCATGGGTAA  |
| hsa-miR-146a    | TGAGAACTGAATCCATGGGTA   |
| hsa-miR-146a    | TGAGAACTGAATCCATGGGTAT  |
| hsa-miR-146a    | TGAGAACTGAATCCATGGGTG   |
| hsa-miR-146a    | TGAGAACTGAATCCATGGGTAG  |
| hsa-miR-146a    | TGAGAACTGAATCCATGGGTC   |
| hsa-miR-146a    | TGAGAACTGAATCCATGGGTTC  |
| hsa-miR-146a    | TGAGAACTGAATCCATGGGTGG  |
| hsa-miR-146a    | TGAGAACTGAATCCATGGGTGA  |
| hsa-miR-146a    | TGAGAACTGAATCCATGGGTCA  |
| hsa-miR-146a    | TGAGAACTGAATCCATGGGTGT  |
| hsa-miR-146b-5p | TGAGAACTGAATCCATAGGCTG  |
| hsa-miR-146b-5p | TGAGAACTGAATCCATAGGCT   |
| hsa-miR-146b-5p | TGAGAACTGAATCCATAGGC    |
| hsa-miR-146b-5p | TGAGAACTGAATCCATAGGCTA  |



|                 |                         |
|-----------------|-------------------------|
| hsa-miR-146b-5p | TGAGAACTGAATTCATAGGCA   |
| hsa-miR-146b-5p | TGAGAACTGAATTCATAGGCTT  |
| hsa-miR-146b-5p | TGAGAACTGAATTCATAGGCAA  |
| hsa-miR-146b-5p | TGAGAACTGAATTCATAGGCGG  |
| hsa-miR-146b-5p | TGAGAACTGAATTCATAGGCG   |
| hsa-miR-148a    | TCAGTGCACTACAGAACCTTGT  |
| hsa-miR-148a    | TCAGTGCACTACAGAACCTTG   |
| hsa-miR-148a    | TCAGTGCACTACAGAACCTTGAA |
| hsa-miR-148a    | TCAGTGCACTACAGAACCTTGA  |
| hsa-miR-148a    | TCAGTGCACTACAGAACCTTGTC |
| hsa-miR-148a    | TCAGTGCACTACAGAACCTTGT  |
| hsa-miR-148a    | TCAGTGCACTACAGAACCTTGTA |
| hsa-miR-148a    | TCAGTGCACTACAGAACCTTGG  |
| hsa-miR-148a    | TCAGTGCACTACAGAACCTTGC  |
| hsa-miR-148a*   | AAAGTTCTGAGACACTCCGACT  |
| hsa-miR-148a*   | AAAGTTCTGAGACACTCCGAC   |
| hsa-miR-148b    | TCAGTGCACTACAGAACCTTGT  |
| hsa-miR-148b    | TCAGTGCACTACAGAACCTTG   |
| hsa-miR-148b    | TCAGTGCACTACAGAACCTTGT  |
| hsa-miR-148b    | TCAGTGCACTACAGAACCTTGAA |
| hsa-miR-148b    | TCAGTGCACTACAGAACCTTGA  |
| hsa-miR-148b    | TCAGTGCACTACAGAACCTTGTA |
| hsa-miR-148b*   | AAGTTCTGTTATACACTCAGGCT |
| hsa-miR-150     | TCTCCCAACCCTTGACCAAGTG  |
| hsa-miR-150     | TCTCCCAACCCTTGACCAAGTG  |
| hsa-miR-150     | TCTCCCAACCCTTGACCAAGT   |
| hsa-miR-150     | TCTCCCAACCCTTGACCAAGTA  |
| hsa-miR-150*    | CTGGTACAGGCCTGGGGGACA   |
| hsa-miR-151-3p  | CTAGACTGAAGCTCCTTGAGGAA |
| hsa-miR-151-3p  | CTAGACTGAAGCTCCTTGAGGA  |
| hsa-miR-151-3p  | CTAGACTGAAGCTCCTTGAGG   |
| hsa-miR-151-3p  | CTAGACTGAAGCTCCTTGAGGT  |
| hsa-miR-151-3p  | CTAGACTGAAGCTCCTTGAGGAT |
| hsa-miR-151-3p  | CTAGACTGAAGCTCCTTGAG    |
| hsa-miR-151-3p  | CTAGACTGAAGCTCCTTGAGGTA |
| hsa-miR-151-3p  | CTAGACTGAAGCTCCTTGAGA   |
| hsa-miR-151-3p  | CTAGACTGAAGCTCCTTGAGAA  |
| hsa-miR-151-3p  | CTAGACTGAAGCTCCTTGAGGAG |
| hsa-miR-151-3p  | CTAGACTGAAGCTCCTTGAGT   |
| hsa-miR-151-3p  | CTAGACTGAAGCTCCTTGAGAAA |
| hsa-miR-151-3p  | CTAGACTGAAGCTCCTTGAGGTT |
| hsa-miR-151-3p  | CTAGACTGAAGCTCCTTGAGGAC |
| hsa-miR-151-3p  | CTAGACTGAAGCTCCTTGAGGC  |
| hsa-miR-151-3p  | CTAGACTGAAGCTCCTTGAGGCA |
| hsa-miR-151-3p  | CTAGACTGAAGCTCCTTGAGTAA |
| hsa-miR-151-5p  | TCGAGGAGCTCACAGTCTAGTA  |
| hsa-miR-151-5p  | TCGAGGAGCTCACAGTCTAGT   |

|                |                          |
|----------------|--------------------------|
| hsa-miR-151-5p | TCGAGGAGCTCACAGTCTAGTAA  |
| hsa-miR-151-5p | TCGAGGAGCTCACAGTCTAG     |
| hsa-miR-151-5p | TCGAGGAGCTCACAGTCTAGTAT  |
| hsa-miR-152    | TCAGTGCATGACAGAACTTGG    |
| hsa-miR-152    | TCAGTGCATGACAGAACTTGGG   |
| hsa-miR-152    | TCAGTGCATGACAGAACTTGGT   |
| hsa-miR-152    | TCAGTGCATGACAGAACTTGGGT  |
| hsa-miR-152    | TCAGTGCATGACAGAACTTGGGA  |
| hsa-miR-152    | TCAGTGCATGACAGAACTTGGTA  |
| hsa-miR-152    | TCAGTGCATGACAGAACTTGGTT  |
| hsa-miR-152    | TCAGTGCATGACAGAACTTGGTA  |
| hsa-miR-152    | TCAGTGCATGACAGAACTTGG    |
| hsa-miR-152    | TCAGTGCATGACAGAACTTGT    |
| hsa-miR-155    | TTAATGCTAATCGTGATAGGGGT  |
| hsa-miR-155    | TTAATGCTAATCGTGATAGGGG   |
| hsa-miR-155    | TTAATGCTAATCGTGATAGGGGA  |
| hsa-miR-155    | TTAATGCTAATCGTGATAGGGGG  |
| hsa-miR-155    | TTAATGCTAATCGTGATAGGGGGC |
| hsa-miR-155*   | CTCCTACATATTAGCATTAAACA  |
| hsa-miR-155*   | CTCCTACATATTAGCATTAAAC   |
| hsa-miR-155*   | CTCCTACATATTAGCATTAACT   |
| hsa-miR-155*   | CTCCTACATATTAGCATTAAACAA |
| hsa-miR-155*   | CTCCTACATATTAGCATTAAACC  |
| hsa-miR-15a    | TAGCAGCACATAATGGTTTGTG   |
| hsa-miR-15a    | TAGCAGCACATAATGGTTTGT    |
| hsa-miR-15a    | TAGCAGCACATAATGGTTTGTGA  |
| hsa-miR-15a    | TAGCAGCACATAATGGTTTGTGT  |
| hsa-miR-15a    | TAGCAGCACATAATGGTTTGT    |
| hsa-miR-15a    | TAGCAGCACATAATGGTTTGTGA  |
| hsa-miR-15a    | TAGCAGCACATAATGGTTTGTGG  |
| hsa-miR-15b    | TAGCAGCACATCATGGTTTACA   |
| hsa-miR-15b    | TAGCAGCACATCATGGTTTAC    |
| hsa-miR-15b    | TAGCAGCACATCATGGTTTACAA  |
| hsa-miR-15b*   | CGAATCATTATTTGCTGCTCTA   |
| hsa-miR-15b*   | CGAATCATTATTTGCTGCTCT    |
| hsa-miR-15b*   | CGAATCATTATTTGCTGCTCTAA  |
| hsa-miR-15b*   | CGAATCATTATTTGCTGCTCTAT  |
| hsa-miR-16     | TAGCAGCACGTAATATTGGCG    |
| hsa-miR-16     | TAGCAGCACGTAATATTGGCGT   |
| hsa-miR-16     | TAGCAGCACGTAATATTGGC     |
| hsa-miR-16     | TAGCAGCACGTAATATTGGCGA   |
| hsa-miR-16     | TAGCAGCACGTAATATTGGCA    |
| hsa-miR-16     | TAGCAGCACGTAATATTGGCAA   |
| hsa-miR-16     | TAGCAGCACGTAATATTGGCT    |
| hsa-miR-16-1*  | CCAGTATTAAGTGTGCTGCTGA   |
| hsa-miR-16-1*  | CCAGTATTAAGTGTGCTGCTGAA  |
| hsa-miR-16-2*  | CCAATATTACTGTGCTGCTTTA   |
| hsa-miR-16-2*  | CCAATATTACTGTGCTGCTTT    |

|                 |                         |
|-----------------|-------------------------|
| hsa-miR-16-2*   | CCAATATTACTGTGCTGCTTTAA |
| hsa-miR-16-2*   | CCAATATTACTGTGCTGCTTTT  |
| hsa-miR-17      | CAAAGTGCTTACAGTGCAGGTAG |
| hsa-miR-17      | CAAAGTGCTTACAGTGCAGGTA  |
| hsa-miR-17      | CAAAGTGCTTACAGTGCAGGTAA |
| hsa-miR-17      | CAAAGTGCTTACAGTGCAGGTAT |
| hsa-miR-17*     | ACTGCAGTGAAGGCACTTGTAG  |
| hsa-miR-17*     | ACTGCAGTGAAGGCACTTGTAGA |
| hsa-miR-17*     | ACTGCAGTGAAGGCACTTGTAGC |
| hsa-miR-17*     | ACTGCAGTGAAGGCACTTGTGA  |
| hsa-miR-17*     | ACTGCAGTGAAGGCACTTGTAGT |
| hsa-miR-17*     | ACTGCAGTGAAGGCACTTGTAA  |
| hsa-miR-17*     | ACTGCAGTGAAGGCACTTGTAT  |
| hsa-miR-181a    | AACATTCAACGCTGTCGGTGAGT |
| hsa-miR-181a    | AACATTCAACGCTGTCGGTGAG  |
| hsa-miR-181a    | AACATTCAACGCTGTCGGTGAGA |
| hsa-miR-181a    | AACATTCAACGCTGTCGGTGAGG |
| hsa-miR-181a    | AACATTCAACGCTGTCGGTGAGC |
| hsa-miR-181a*   | ACCATCGACCGTTGATTGTACC  |
| hsa-miR-181a*   | ACCATCGACCGTTGATTGTAC   |
| hsa-miR-181a*   | ACCATCGACCGTTGATTGTACT  |
| hsa-miR-181a-2* | ACCACTGACCGTTGACTGTAC   |
| hsa-miR-181a-2* | ACCACTGACCGTTGACTGTACC  |
| hsa-miR-181a-2* | ACCACTGACCGTTGACTGTACT  |
| hsa-miR-181b    | AACATTCACTGCTGTCGGTGGGT |
| hsa-miR-181b    | AACATTCACTGCTGTCGGTGGG  |
| hsa-miR-181b    | AACATTCACTGCTGTCGGTGGGA |
| hsa-miR-181b    | AACATTCACTGCTGTCGGTGGGG |
| hsa-miR-181b    | AACATTCACTGCTGTCGGTGGGC |
| hsa-miR-181c    | AACATTCAACCTGTCGGTGAGTT |
| hsa-miR-181c    | AACATTCAACCTGTCGGTGAGT  |
| hsa-miR-181c    | AACATTCAACCTGTCGGTGAG   |
| hsa-miR-181d    | AACATTCACTGTTGTCGGTGGGT |
| hsa-miR-181d    | AACATTCACTGTTGTCGGTGGG  |
| hsa-miR-181d    | AACATTCACTGTTGTCGGTGGGA |
| hsa-miR-1827    | TGAGGCAGTAGATTGAATAGTT  |
| hsa-miR-1827    | TGAGGCAGTAGATTGAATAGGT  |
| hsa-miR-184     | TGGACGGAGAACTGATAAGGGC  |
| hsa-miR-185     | TGGAGAGAAAGGCAGTTCCTGA  |
| hsa-miR-185     | TGGAGAGAAAGGCAGTTCCTGAA |
| hsa-miR-185     | TGGAGAGAAAGGCAGTTCCTGAT |
| hsa-miR-185     | TGGAGAGAAAGGCAGTTCCTG   |
| hsa-miR-185     | TGGAGAGAAAGGCAGTTCCTGT  |
| hsa-miR-185     | TGGAGAGAAAGGCAGTTCCTGAG |
| hsa-miR-185     | TGGAGAGAAAGGCAGTTCCTGTA |
| hsa-miR-185     | TGGAGAGAAAGGCAGTTCCTGC  |
| hsa-miR-185     | TGGAGAGAAAGGCAGTTCCTGAC |

|                |                         |
|----------------|-------------------------|
| hsa-miR-185    | TGGAGAGAAAGGCAGTTCCTGG  |
| hsa-miR-185    | TGGAGAGAAAGGCAGTTCCTGTT |
| hsa-miR-185*   | AGGGGCTGGCTTTCCTCTGGT   |
| hsa-miR-185*   | AGGGGCTGGCTTTCCTCTGGTA  |
| hsa-miR-186    | CAAAGAATTCTCCTTTGGGCT   |
| hsa-miR-186    | CAAAGAATTCTCCTTTGGGCTT  |
| hsa-miR-186    | CAAAGAATTCTCCTTTGGGC    |
| hsa-miR-186    | CAAAGAATTCTCCTTTGGGCTA  |
| hsa-miR-186    | CAAAGAATTCTCCTTTGGGCA   |
| hsa-miR-186    | CAAAGAATTCTCCTTTGGGCAT  |
| hsa-miR-186    | CAAAGAATTCTCCTTTGGGCAA  |
| hsa-miR-186    | CAAAGAATTCTCCTTTGGGCTG  |
| hsa-miR-186    | CAAAGAATTCTCCTTTGGGCG   |
| hsa-miR-188-5p | CATCCCTTGCATGGTGGAGGGAA |
| hsa-miR-188-5p | CATCCCTTGCATGGTGGAGGGTA |
| hsa-miR-18a    | TAAGGTGCATCTAGTGCAGATAG |
| hsa-miR-18a    | TAAGGTGCATCTAGTGCAGATA  |
| hsa-miR-18a*   | ACTGCCCTAAGTGCTCCTTCTG  |
| hsa-miR-18a*   | ACTGCCCTAAGTGCTCCTTCTGT |
| hsa-miR-18a*   | ACTGCCCTAAGTGCTCCTTCTGA |
| hsa-miR-1908   | CGGCGGGGACGGCGATTGGTC   |
| hsa-miR-1908   | CGGCGGGGACGGCGATTGGT    |
| hsa-miR-191    | CAACGGAATCCCAAAGCAGCTG  |
| hsa-miR-191    | CAACGGAATCCCAAAGCAGCT   |
| hsa-miR-191    | CAACGGAATCCCAAAGCAGCTA  |
| hsa-miR-191    | CAACGGAATCCCAAAGCAGCTT  |
| hsa-miR-191    | CAACGGAATCCCAAAGCAGCTC  |
| hsa-miR-191*   | GCTGCGCTTGGATTCGTCCC    |
| hsa-miR-192    | CTGACCTATGAATTGACAGCC   |
| hsa-miR-192    | CTGACCTATGAATTGACAGCCA  |
| hsa-miR-192    | CTGACCTATGAATTGACAGC    |
| hsa-miR-192    | CTGACCTATGAATTGACAGCCAT |
| hsa-miR-192    | CTGACCTATGAATTGACAGCCAA |
| hsa-miR-192    | CTGACCTATGAATTGACAGCCT  |
| hsa-miR-192    | CTGACCTATGAATTGACAGCCAG |
| hsa-miR-192    | CTGACCTATGAATTGACAGCA   |
| hsa-miR-192    | CTGACCTATGAATTGACAGCT   |
| hsa-miR-192    | CTGACCTATGAATTGACAGCCG  |
| hsa-miR-192    | CTGACCTATGAATTGACAGCAA  |
| hsa-miR-192    | CTGACCTATGAATTGACAGCCC  |
| hsa-miR-192    | CTGACCTATGAATTGACAGCG   |
| hsa-miR-193b   | AACTGGCCCTCAAAGTCCCGCT  |
| hsa-miR-193b   | AACTGGCCCTCAAAGTCCCGCTT |
| hsa-miR-193b   | AACTGGCCCTCAAAGTCCCGC   |
| hsa-miR-193b   | AACTGGCCCTCAAAGTCCCGCTA |
| hsa-miR-193b   | AACTGGCCCTCAAAGTCCCGCA  |
| hsa-miR-193b   | AACTGGCCCTCAAAGTCCCGCC  |

|                 |                         |
|-----------------|-------------------------|
| hsa-miR-193b    | AACTGGCCCTCAAAGTCCCGCCA |
| hsa-miR-193b    | AACTGGCCCTCAAAGTCCCGCAA |
| hsa-miR-193b    | AACTGGCCCTCAAAGTCCCGCAT |
| hsa-miR-193b    | AACTGGCCCTCAAAGTCCCGCCT |
| hsa-miR-193b    | AACTGGCCCTCAAAGTCCCGCTG |
| hsa-miR-193b    | AACTGGCCCTCAAAGTCCCGCG  |
| hsa-miR-193b*   | CGGGGTTTTGAGGGCGAGATGA  |
| hsa-miR-193b*   | CGGGGTTTTGAGGGCGAGATG   |
| hsa-miR-193b*   | CGGGGTTTTGAGGGCGAGATGT  |
| hsa-miR-193b*   | CGGGGTTTTGAGGGCGAGATGAA |
| hsa-miR-193b*   | CGGGGTTTTGAGGGCGAGATGAT |
| hsa-miR-193b*   | CGGGGTTTTGAGGGCGAGATGTT |
| hsa-miR-193b*   | CGGGGTTTTGAGGGCGAGATGTA |
| hsa-miR-193b*   | CGGGGTTTTGAGGGCGAGATGAG |
| hsa-miR-193b*   | CGGGGTTTTGAGGGCGAGATGC  |
| hsa-miR-194     | TGTAACAGCAACTCCATGTGGAA |
| hsa-miR-194     | TGTAACAGCAACTCCATGTGGA  |
| hsa-miR-195     | TAGCAGCACAGAAATATTGGCA  |
| hsa-miR-196a    | TAGGTAGTTTCATGTTGTTGGG  |
| hsa-miR-196a    | TAGGTAGTTTCATGTTGTTGGGA |
| hsa-miR-197     | TTCACCACCTTCTCCACCCAGC  |
| hsa-miR-197     | TTCACCACCTTCTCCACCCAG   |
| hsa-miR-197     | TTCACCACCTTCTCCACCCAGA  |
| hsa-miR-197     | TTCACCACCTTCTCCACCCAGT  |
| hsa-miR-199a-3p | ACAGTAGTCTGCACATTGGTT   |
| hsa-miR-199a-3p | ACAGTAGTCTGCACATTGGTTA  |
| hsa-miR-199a-3p | ACAGTAGTCTGCACATTGGTTT  |
| hsa-miR-199a-3p | ACAGTAGTCTGCACATTGGTTAA |
| hsa-miR-199b-3p | ACAGTAGTCTGCACATTGGTT   |
| hsa-miR-199b-3p | ACAGTAGTCTGCACATTGGTTA  |
| hsa-miR-199b-3p | ACAGTAGTCTGCACATTGGTTT  |
| hsa-miR-199b-3p | ACAGTAGTCTGCACATTGGTTAA |
| hsa-miR-19a     | TGTGCAAATCTATGCAAACTGA  |
| hsa-miR-19b     | TGTGCAAATCCATGCAAACTGA  |
| hsa-miR-19b     | TGTGCAAATCCATGCAAACTG   |
| hsa-miR-19b     | TGTGCAAATCCATGCAAACTGT  |
| hsa-miR-200a    | TAACACTGTCTGGTAACGATGTT |
| hsa-miR-200b    | TAATACTGCCTGGTAATGATGAC |
| hsa-miR-200c    | TAATACTGCCGGTAATGATGGA  |
| hsa-miR-200c    | TAATACTGCCGGTAATGATGG   |
| hsa-miR-20a     | TAAAGTGCTTATAGTGCAGGTAG |
| hsa-miR-20a     | TAAAGTGCTTATAGTGCAGGTA  |
| hsa-miR-20a     | TAAAGTGCTTATAGTGCAGGTAA |
| hsa-miR-20a     | TAAAGTGCTTATAGTGCAGGTAT |
| hsa-miR-20a*    | ACTGCATTATGAGCACTTAAAGT |
| hsa-miR-20b     | CAAAGTGCTCATAGTGCAGGTAG |
| hsa-miR-20b     | CAAAGTGCTCATAGTGCAGGTA  |

|              |                         |
|--------------|-------------------------|
| hsa-miR-20b  | CAAAGTGCTCATAGTCAGGTAA  |
| hsa-miR-20b  | CAAAGTGCTCATAGTCAGGTAT  |
| hsa-miR-20b* | ACTGTAGTATGGGCACTTCCA   |
| hsa-miR-20b* | ACTGTAGTATGGGCACTTCCAGT |
| hsa-miR-20b* | ACTGTAGTATGGGCACTTCCAG  |
| hsa-miR-21   | TAGCTTATCAGACTGATGTTGAC |
| hsa-miR-21   | TAGCTTATCAGACTGATGTTGA  |
| hsa-miR-21   | TAGCTTATCAGACTGATGTTG   |
| hsa-miR-21   | TAGCTTATCAGACTGATGTTGAA |
| hsa-miR-21   | TAGCTTATCAGACTGATGTTGAT |
| hsa-miR-21   | TAGCTTATCAGACTGATGTTGAG |
| hsa-miR-21   | TAGCTTATCAGACTGATGTTGT  |
| hsa-miR-21   | TAGCTTATCAGACTGATGTTGCC |
| hsa-miR-21   | TAGCTTATCAGACTGATGTTGC  |
| hsa-miR-21   | TAGCTTATCAGACTGATGTTGTC |
| hsa-miR-21   | TAGCTTATCAGACTGATGTTGGC |
| hsa-miR-21   | TAGCTTATCAGACTGATGTTGG  |
| hsa-miR-21   | TAGCTTATCAGACTGATGTTGTT |
| hsa-miR-21   | TAGCTTATCAGACTGATGTTGCA |
| hsa-miR-21*  | CAACACCAGTCGATGGGCTGTC  |
| hsa-miR-21*  | CAACACCAGTCGATGGGCTGT   |
| hsa-miR-21*  | CAACACCAGTCGATGGGCTG    |
| hsa-miR-21*  | CAACACCAGTCGATGGGCTGTA  |
| hsa-miR-21*  | CAACACCAGTCGATGGGCTGTAA |
| hsa-miR-21*  | CAACACCAGTCGATGGGCTGTCA |
| hsa-miR-21*  | CAACACCAGTCGATGGGCTGGC  |
| hsa-miR-21*  | CAACACCAGTCGATGGGCTGTT  |
| hsa-miR-21*  | CAACACCAGTCGATGGGCTGTCT |
| hsa-miR-21*  | CAACACCAGTCGATGGGCTGG   |
| hsa-miR-21*  | CAACACCAGTCGATGGGCTGTAT |
| hsa-miR-21*  | CAACACCAGTCGATGGGCTGTAG |
| hsa-miR-21*  | CAACACCAGTCGATGGGCTGA   |
| hsa-miR-21*  | CAACACCAGTCGATGGGCTGGA  |
| hsa-miR-21*  | CAACACCAGTCGATGGGCTGTTA |
| hsa-miR-210  | CTGTGCGTGTGACAGCGGCTGA  |
| hsa-miR-210  | CTGTGCGTGTGACAGCGGCTGAA |
| hsa-miR-210  | CTGTGCGTGTGACAGCGGCTGT  |
| hsa-miR-210  | CTGTGCGTGTGACAGCGGCTG   |
| hsa-miR-210  | CTGTGCGTGTGACAGCGGCTGAT |
| hsa-miR-210  | CTGTGCGTGTGACAGCGGCTGG  |
| hsa-miR-210  | CTGTGCGTGTGACAGCGGCTGTA |
| hsa-miR-210  | CTGTGCGTGTGACAGCGGCTGGA |
| hsa-miR-210  | CTGTGCGTGTGACAGCGGCTGAG |
| hsa-miR-210  | CTGTGCGTGTGACAGCGGCTGC  |
| hsa-miR-210  | CTGTGCGTGTGACAGCGGCTGGT |
| hsa-miR-210  | CTGTGCGTGTGACAGCGGCTGTT |
| hsa-miR-210  | CTGTGCGTGTGACAGCGGCTGAC |

|                  |                          |
|------------------|--------------------------|
| hsa-miR-2110     | TTGGGGAAACGGCCGCTGAGTGA  |
| hsa-miR-2110     | TTGGGGAAACGGCCGCTGAGTG   |
| hsa-miR-2110     | TTGGGGAAACGGCCGCTGAGT    |
| hsa-miR-212      | TAACAGTCTCCAGTCACGGCCA   |
| hsa-miR-212      | TAACAGTCTCCAGTCACGGCCAT  |
| hsa-miR-215      | ATGACCTATGAATTGACAGACA   |
| hsa-miR-215      | ATGACCTATGAATTGACAGAC    |
| hsa-miR-219-1-3p | AGAGTTGAGTCTGGACGTCCCG   |
| hsa-miR-219-5p   | TGATTGTCCAAACGCAATTCTCG  |
| hsa-miR-22       | AAGCTGCCAGTTGAAGAAGTGT   |
| hsa-miR-22       | AAGCTGCCAGTTGAAGAAGTGT   |
| hsa-miR-22       | AAGCTGCCAGTTGAAGAAGTGT   |
| hsa-miR-22       | AAGCTGCCAGTTGAAGAAGTGT   |
| hsa-miR-22       | AAGCTGCCAGTTGAAGAAGTGT   |
| hsa-miR-22       | AAGCTGCCAGTTGAAGAAGTGT   |
| hsa-miR-22*      | AGTTCTTCAGTGGCAAGCTTT    |
| hsa-miR-22*      | AGTTCTTCAGTGGCAAGCTTTA   |
| hsa-miR-22*      | AGTTCTTCAGTGGCAAGCTTTT   |
| hsa-miR-221      | AGCTACATTGTCTGCTGGGTTT   |
| hsa-miR-221      | AGCTACATTGTCTGCTGGGTTA   |
| hsa-miR-221      | AGCTACATTGTCTGCTGGGTTT   |
| hsa-miR-221      | AGCTACATTGTCTGCTGGGTTT   |
| hsa-miR-221      | AGCTACATTGTCTGCTGGGTTT   |
| hsa-miR-221*     | ACCTGGCATAACAATGTAGATT   |
| hsa-miR-221*     | ACCTGGCATAACAATGTAGATT   |
| hsa-miR-221*     | ACCTGGCATAACAATGTAGATTTC |
| hsa-miR-221*     | ACCTGGCATAACAATGTAGATTTT |
| hsa-miR-221*     | ACCTGGCATAACAATGTAGATTTA |
| hsa-miR-221*     | ACCTGGCATAACAATGTAGATTA  |
| hsa-miR-221*     | ACCTGGCATAACAATGTAGATTG  |
| hsa-miR-222      | AGCTACATCTGGCTACTGGGTCT  |
| hsa-miR-222      | AGCTACATCTGGCTACTGGGT    |
| hsa-miR-222      | AGCTACATCTGGCTACTGGGTC   |
| hsa-miR-222      | AGCTACATCTGGCTACTGGGTCA  |
| hsa-miR-222      | AGCTACATCTGGCTACTGGGTAA  |
| hsa-miR-222      | AGCTACATCTGGCTACTGGGTA   |
| hsa-miR-222      | AGCTACATCTGGCTACTGGGGCT  |
| hsa-miR-222      | AGCTACATCTGGCTACTGGG     |
| hsa-miR-222      | AGCTACATCTGGCTACTGGGTAT  |
| hsa-miR-222      | AGCTACATCTGGCTACTGGGTT   |
| hsa-miR-222      | AGCTACATCTGGCTACTGGGG    |
| hsa-miR-222      | AGCTACATCTGGCTACTGGGTTT  |
| hsa-miR-222      | AGCTACATCTGGCTACTGGGGC   |
| hsa-miR-222      | AGCTACATCTGGCTACTGGGTCC  |
| hsa-miR-222      | AGCTACATCTGGCTACTGGGA    |
| hsa-miR-222      | AGCTACATCTGGCTACTGGGTTA  |
| hsa-miR-222      | AGCTACATCTGGCTACTGGGCCT  |

|                 |                         |
|-----------------|-------------------------|
| hsa-miR-222     | AGCTACATCTGGCTACTGGGGCA |
| hsa-miR-222     | AGCTACATCTGGCTACTGGGAA  |
| hsa-miR-222     | AGCTACATCTGGCTACTGGGGAA |
| hsa-miR-222     | AGCTACATCTGGCTACTGGGACT |
| hsa-miR-222     | AGCTACATCTGGCTACTGGGTCC |
| hsa-miR-222     | AGCTACATCTGGCTACTGGGTAG |
| hsa-miR-222     | AGCTACATCTGGCTACTGGGGA  |
| hsa-miR-222     | AGCTACATCTGGCTACTGGGAAA |
| hsa-miR-222     | AGCTACATCTGGCTACTGGGC   |
| hsa-miR-222     | AGCTACATCTGGCTACTGGGCC  |
| hsa-miR-222     | AGCTACATCTGGCTACTGGGGAT |
| hsa-miR-223     | TGTCAGTTTGTCAAATACCCCA  |
| hsa-miR-223     | TGTCAGTTTGTCAAATACCCCAA |
| hsa-miR-223     | TGTCAGTTTGTCAAATACCCCAT |
| hsa-miR-223*    | CGTGTATTTGACAAGCTGAGTTG |
| hsa-miR-223*    | CGTGTATTTGACAAGCTGAGTT  |
| hsa-miR-223*    | CGTGTATTTGACAAGCTGAGT   |
| hsa-miR-2355-3p | ATTGTCCTTGCTGTTTGAGAT   |
| hsa-miR-2355-5p | ATCCCCAGATACAATGGACAAT  |
| hsa-miR-23a     | ATCACATTGCCAGGGATTCCA   |
| hsa-miR-23a     | ATCACATTGCCAGGGATTTC    |
| hsa-miR-23a     | ATCACATTGCCAGGGATTCCAA  |
| hsa-miR-23a     | ATCACATTGCCAGGGATTCC    |
| hsa-miR-23a     | ATCACATTGCCAGGGATTCCAT  |
| hsa-miR-23a     | ATCACATTGCCAGGGATTCA    |
| hsa-miR-23a     | ATCACATTGCCAGGGATTCT    |
| hsa-miR-23a     | ATCACATTGCCAGGGATTCCAG  |
| hsa-miR-23a     | ATCACATTGCCAGGGATTCAA   |
| hsa-miR-23a     | ATCACATTGCCAGGGATTCCCT  |
| hsa-miR-23a     | ATCACATTGCCAGGGATTCCG   |
| hsa-miR-23a*    | GGGGTTCCTGGGGATGGGATT   |
| hsa-miR-23a*    | GGGGTTCCTGGGGATGGGATT   |
| hsa-miR-23b     | ATCACATTGCCAGGGATTACCA  |
| hsa-miR-23b     | ATCACATTGCCAGGGATTACCAT |
| hsa-miR-23b     | ATCACATTGCCAGGGATTACC   |
| hsa-miR-23b     | ATCACATTGCCAGGGATTAC    |
| hsa-miR-23b     | ATCACATTGCCAGGGATTACCAC |
| hsa-miR-23b     | ATCACATTGCCAGGGATTACCAA |
| hsa-miR-23b*    | TGGGTTCCCTGGCATGCTGATT  |
| hsa-miR-23b*    | TGGGTTCCCTGGCATGCTGATT  |
| hsa-miR-24      | TGGCTCAGTTCAGCAGGAACAGT |
| hsa-miR-24      | TGGCTCAGTTCAGCAGGAACAG  |
| hsa-miR-24      | TGGCTCAGTTCAGCAGGAACA   |
| hsa-miR-24      | TGGCTCAGTTCAGCAGGAACAGA |
| hsa-miR-24      | TGGCTCAGTTCAGCAGGAACAA  |
| hsa-miR-24      | TGGCTCAGTTCAGCAGGAACAT  |
| hsa-miR-24      | TGGCTCAGTTCAGCAGGAACATT |



|                |                         |
|----------------|-------------------------|
| hsa-miR-25     | CATTGCACTTGTCTCGGTCTGA  |
| hsa-miR-25     | CATTGCACTTGTCTCGGTCTG   |
| hsa-miR-25     | CATTGCACTTGTCTCGGTCTGT  |
| hsa-miR-25     | CATTGCACTTGTCTCGGTCTGAA |
| hsa-miR-25     | CATTGCACTTGTCTCGGTCTGAT |
| hsa-miR-25     | CATTGCACTTGTCTCGGTCTGTA |
| hsa-miR-25     | CATTGCACTTGTCTCGGTCTGC  |
| hsa-miR-25     | CATTGCACTTGTCTCGGTCTGG  |
| hsa-miR-25     | CATTGCACTTGTCTCGGTCTGTT |
| hsa-miR-25     | CATTGCACTTGTCTCGGTCTGAG |
| hsa-miR-25     | CATTGCACTTGTCTCGGTCTGAC |
| hsa-miR-25*    | AGGCGGAGACTTGGGCAATTGCT |
| hsa-miR-25*    | AGGCGGAGACTTGGGCAATTG   |
| hsa-miR-25*    | AGGCGGAGACTTGGGCAATTGC  |
| hsa-miR-25*    | AGGCGGAGACTTGGGCAATT    |
| hsa-miR-25*    | AGGCGGAGACTTGGGCAATTGT  |
| hsa-miR-25*    | AGGCGGAGACTTGGGCAATTGA  |
| hsa-miR-25*    | AGGCGGAGACTTGGGCAATTT   |
| hsa-miR-25*    | AGGCGGAGACTTGGGCAATTGAT |
| hsa-miR-25*    | AGGCGGAGACTTGGGCAATTGT  |
| hsa-miR-25*    | AGGCGGAGACTTGGGCAATTGCA |
| hsa-miR-25*    | AGGCGGAGACTTGGGCAATTTCT |
| hsa-miR-25*    | AGGCGGAGACTTGGGCAATTA   |
| hsa-miR-25*    | AGGCGGAGACTTGGGCAATTGAA |
| hsa-miR-25*    | AGGCGGAGACTTGGGCAATTGCG |
| hsa-miR-26a    | TTCAAGTAATCCAGGATAGGCT  |
| hsa-miR-26a    | TTCAAGTAATCCAGGATAGGCTA |
| hsa-miR-26a    | TTCAAGTAATCCAGGATAGGC   |
| hsa-miR-26a    | TTCAAGTAATCCAGGATAGGCTT |
| hsa-miR-26a    | TTCAAGTAATCCAGGATAGGCA  |
| hsa-miR-26a    | TTCAAGTAATCCAGGATAGGCAA |
| hsa-miR-26a    | TTCAAGTAATCCAGGATAGGCTG |
| hsa-miR-26a    | TTCAAGTAATCCAGGATAGGCG  |
| hsa-miR-26a    | TTCAAGTAATCCAGGATAGGCAT |
| hsa-miR-26a-2* | CCTATTCTTGATTACTTGTTT   |
| hsa-miR-26a-2* | CCTATTCTTGATTACTTGTTTC  |
| hsa-miR-26b    | TTCAAGTAATCCAGGATAGGTT  |
| hsa-miR-26b    | TTCAAGTAATCCAGGATAGGT   |
| hsa-miR-26b    | TTCAAGTAATCCAGGATAGGTTA |
| hsa-miR-26b    | TTCAAGTAATCCAGGATAGGTTT |
| hsa-miR-26b    | TTCAAGTAATCCAGGATAGGTA  |
| hsa-miR-26b    | TTCAAGTAATCCAGGATAGGTTG |
| hsa-miR-26b    | TTCAAGTAATCCAGGATAGGGT  |
| hsa-miR-26b    | TTCAAGTAATCCAGGATAGG    |
| hsa-miR-26b    | TTCAAGTAATCCAGGATAGGTAA |
| hsa-miR-26b    | TTCAAGTAATCCAGGATAGGCT  |
| hsa-miR-26b    | TTCAAGTAATCCAGGATAGGTG  |

|                |                         |
|----------------|-------------------------|
| hsa-miR-26b    | TTCAAGTAATTCAGGATAGGAT  |
| hsa-miR-26b    | TTCAAGTAATTCAGGATAGGTAG |
| hsa-miR-26b    | TTCAAGTAATTCAGGATAGGG   |
| hsa-miR-26b    | TTCAAGTAATTCAGGATAGGTAT |
| hsa-miR-26b    | TTCAAGTAATTCAGGATAGGTC  |
| hsa-miR-26b    | TTCAAGTAATTCAGGATAGGGTA |
| hsa-miR-27a    | TTCACAGTGGCTAAGTTCCG    |
| hsa-miR-27a    | TTCACAGTGGCTAAGTTCCGT   |
| hsa-miR-27a    | TTCACAGTGGCTAAGTTCCGA   |
| hsa-miR-27a    | TTCACAGTGGCTAAGTTCCGC   |
| hsa-miR-27a    | TTCACAGTGGCTAAGTTCCGTT  |
| hsa-miR-27a    | TTCACAGTGGCTAAGTTCCGAAA |
| hsa-miR-27a    | TTCACAGTGGCTAAGTTCCGAA  |
| hsa-miR-27a    | TTCACAGTGGCTAAGTTCCGTTT |
| hsa-miR-27a    | TTCACAGTGGCTAAGTTCCGTTA |
| hsa-miR-27a    | TTCACAGTGGCTAAGTTCCGCA  |
| hsa-miR-27a    | TTCACAGTGGCTAAGTTCCGCAA |
| hsa-miR-27a    | TTCACAGTGGCTAAGTTCCGAT  |
| hsa-miR-27a    | TTCACAGTGGCTAAGTTCCGCT  |
| hsa-miR-27a    | TTCACAGTGGCTAAGTTCCGTAA |
| hsa-miR-27a    | TTCACAGTGGCTAAGTTCCGTA  |
| hsa-miR-27a    | TTCACAGTGGCTAAGTTCCGTAT |
| hsa-miR-27a*   | AGGGCTTAGCTGCTTGTGAGCA  |
| hsa-miR-27a*   | AGGGCTTAGCTGCTTGTGAGC   |
| hsa-miR-27b    | TTCACAGTGGCTAAGTTCTG    |
| hsa-miR-27b    | TTCACAGTGGCTAAGTTCTGC   |
| hsa-miR-27b    | TTCACAGTGGCTAAGTTCTGCA  |
| hsa-miR-27b    | TTCACAGTGGCTAAGTTCTGA   |
| hsa-miR-27b    | TTCACAGTGGCTAAGTTCTGAA  |
| hsa-miR-27b    | TTCACAGTGGCTAAGTTCTGCAA |
| hsa-miR-27b    | TTCACAGTGGCTAAGTTCTGCAT |
| hsa-miR-27b    | TTCACAGTGGCTAAGTTCTGTT  |
| hsa-miR-27b    | TTCACAGTGGCTAAGTTCTGAAA |
| hsa-miR-27b    | TTCACAGTGGCTAAGTTCTGCT  |
| hsa-miR-27b    | TTCACAGTGGCTAAGTTCTGT   |
| hsa-miR-27b*   | AGAGCTTAGCTGATTGGTGAACA |
| hsa-miR-27b*   | AGAGCTTAGCTGATTGGTGAAC  |
| hsa-miR-27b*   | AGAGCTTAGCTGATTGGTGAA   |
| hsa-miR-28-3p  | CACTAGATTGTGAGCTCCTGGA  |
| hsa-miR-28-3p  | CACTAGATTGTGAGCTCCTGAA  |
| hsa-miR-28-5p  | AAGGAGCTCACAGTCTATTGAG  |
| hsa-miR-296-5p | AGGGCCCCCCTCAATCCTGT    |
| hsa-miR-29a    | TAGCACCATCTGAAATCGGTTA  |
| hsa-miR-29a    | TAGCACCATCTGAAATCGGTT   |
| hsa-miR-29a    | TAGCACCATCTGAAATCGGTTAA |
| hsa-miR-29a    | TAGCACCATCTGAAATCGGTTT  |
| hsa-miR-29a    | TAGCACCATCTGAAATCGGTTAT |

|                |                          |
|----------------|--------------------------|
| hsa-miR-29a    | TAGCACCATCTGAAATCGGTTC   |
| hsa-miR-29a    | TAGCACCATCTGAAATCGGTTTA  |
| hsa-miR-29a    | TAGCACCATCTGAAATCGGTTAG  |
| hsa-miR-29a    | TAGCACCATCTGAAATCGGTTTT  |
| hsa-miR-29a*   | ACTGATTTCTTTTGGTGTTGAGA  |
| hsa-miR-29a*   | ACTGATTTCTTTTGGTGTTGAG   |
| hsa-miR-29a*   | ACTGATTTCTTTTGGTGTTCA    |
| hsa-miR-29b    | TAGCACCATTGAAATCAGTGTT   |
| hsa-miR-29b    | TAGCACCATTGAAATCAGTGTT   |
| hsa-miR-29b    | TAGCACCATTGAAATCAGTGTA   |
| hsa-miR-29b-1* | GCTGGTTTCATATGGTGGTTTAG  |
| hsa-miR-29b-2* | CTGGTTTCACATGGTGGCTTAGA  |
| hsa-miR-29b-2* | CTGGTTTCACATGGTGGCTTA    |
| hsa-miR-29c    | TAGCACCATTGAAATCGGTTA    |
| hsa-miR-29c    | TAGCACCATTGAAATCGGTT     |
| hsa-miR-29c    | TAGCACCATTGAAATCGGTTT    |
| hsa-miR-29c    | TAGCACCATTGAAATCGGTTAA   |
| hsa-miR-29c    | TAGCACCATTGAAATCGGTTAT   |
| hsa-miR-29c*   | TGACCGATTTCTCCTGGTGTT    |
| hsa-miR-30a    | TGTA AACATCCTCGACTGGAAGC |
| hsa-miR-30a    | TGTA AACATCCTCGACTGGAAG  |
| hsa-miR-30a    | TGTA AACATCCTCGACTGGAAGA |
| hsa-miR-30a*   | CTTTCAGTCGGATGTTTGACGC   |
| hsa-miR-30a*   | CTTTCAGTCGGATGTTTGACGT   |
| hsa-miR-30b    | TGTA AACATCCTACACTCAGCT  |
| hsa-miR-30b    | TGTA AACATCCTACACTCAGC   |
| hsa-miR-30b    | TGTA AACATCCTACACTCAGCTA |
| hsa-miR-30b*   | CTGGGAGGTGGATGTTTACTT    |
| hsa-miR-30b*   | CTGGGAGGTGGATGTTTACTTC   |
| hsa-miR-30b*   | CTGGGAGGTGGATGTTTACTTT   |
| hsa-miR-30b*   | CTGGGAGGTGGATGTTTACTTA   |
| hsa-miR-30c    | TGTA AACATCCTACACTCTCAGC |
| hsa-miR-30c    | TGTA AACATCCTACACTCTCAG  |
| hsa-miR-30c    | TGTA AACATCCTACACTCTCAGA |
| hsa-miR-30c-1* | CTGGGAGAGGGTTGTTTACTC    |
| hsa-miR-30c-1* | CTGGGAGAGGGTTGTTTACTCC   |
| hsa-miR-30c-1* | CTGGGAGAGGGTTGTTTACTCT   |
| hsa-miR-30d    | TGTA AACATCCCCGACTGGAAGC |
| hsa-miR-30d    | TGTA AACATCCCCGACTGGAAG  |
| hsa-miR-30d    | TGTA AACATCCCCGACTGGAAGA |
| hsa-miR-30d    | TGTA AACATCCCCGACTGGAA   |
| hsa-miR-30d    | TGTA AACATCCCCGACTGGAAA  |
| hsa-miR-30d    | TGTA AACATCCCCGACTGGAAGT |
| hsa-miR-30d    | TGTA AACATCCCCGACTGGAAAA |
| hsa-miR-30d*   | CTTTCAGTCAGATGTTTGCTGC   |
| hsa-miR-30d*   | CTTTCAGTCAGATGTTTGCTGCT  |
| hsa-miR-30e    | TGTA AACATCCTTGACTGGAAGC |

|                 |                         |
|-----------------|-------------------------|
| hsa-miR-30e     | TGTAACATCCTTGACTGGAAG   |
| hsa-miR-30e     | TGTAACATCCTTGACTGGAAGA  |
| hsa-miR-30e     | TGTAACATCCTTGACTGGAA    |
| hsa-miR-30e*    | CTTTCAGTCGGATGTTTACAGT  |
| hsa-miR-30e*    | CTTTCAGTCGGATGTTTACAGC  |
| hsa-miR-30e*    | CTTTCAGTCGGATGTTTACAG   |
| hsa-miR-30e*    | CTTTCAGTCGGATGTTTACAGTT |
| hsa-miR-30e*    | CTTTCAGTCGGATGTTTACAGCA |
| hsa-miR-30e*    | CTTTCAGTCGGATGTTTACAGA  |
| hsa-miR-30e*    | CTTTCAGTCGGATGTTTACAGTA |
| hsa-miR-30e*    | CTTTCAGTCGGATGTTTACAGCT |
| hsa-miR-30e*    | CTTTCAGTCGGATGTTTACAGG  |
| hsa-miR-30e*    | CTTTCAGTCGGATGTTTACAGAA |
| hsa-miR-30e*    | CTTTCAGTCGGATGTTTACAGAT |
| hsa-miR-30e*    | CTTTCAGTCGGATGTTTACAGCC |
| hsa-miR-30e*    | CTTTCAGTCGGATGTTTACAGGT |
| hsa-miR-3121    | TAAATAGAGTAGGCAAAGGACA  |
| hsa-miR-3127    | ATCAGGGCTTGGAATGGGAAG   |
| hsa-miR-3127    | ATCAGGGCTTGGAATGGGAA    |
| hsa-miR-3130-3p | GCTGCACCGGAGACTGGGTAA   |
| hsa-miR-3130-3p | GCTGCACCGGAGACTGGGTAAG  |
| hsa-miR-3136    | CTGACTGAATAGGTAGGGTCAT  |
| hsa-miR-3140    | AGCTTTTGGGAATTCAGGTAG   |
| hsa-miR-3140    | AGCTTTTGGGAATTCAGGTAGT  |
| hsa-miR-3141    | GAGGGCGGGTGGAGGAGGAA    |
| hsa-miR-3149    | TTTGTATGGATATGTGTGTAT   |
| hsa-miR-3153    | GGGAAAGCGAGTAGGGACATT   |
| hsa-miR-3158    | AAGGGCTTCTCTCTGCAGGAC   |
| hsa-miR-3158    | AAGGGCTTCTCTCTGCAGGACA  |
| hsa-miR-3158    | AAGGGCTTCTCTCTGCAGGA    |
| hsa-miR-3164    | TGTGACTTTAAGGAAATGGCG   |
| hsa-miR-3165    | AGGTGGATGCAATGTGACCTCA  |
| hsa-miR-3179    | AGAAGGGGTGAAATTTAAACGT  |
| hsa-miR-3179    | AGAAGGGGTGAAATTTAAACG   |
| hsa-miR-3182    | GCTTCTGTAGTGTAGTGTTAT   |
| hsa-miR-3182    | GCTTCTGTAGTGTAGTGG      |
| hsa-miR-3182    | GCTTCTGTAGTGTAGTGTTATC  |
| hsa-miR-3182    | GCTTCTGTAGTGTAGTGGT     |
| hsa-miR-3182    | GCTTCTGTAGTGTAGTGTT     |
| hsa-miR-3182    | GCTTCTGTAGTGTAGTGTTA    |
| hsa-miR-3182    | GCTTCTGTAGTGTAGTGGA     |
| hsa-miR-3182    | GCTTCTGTAGTGTAGTGGA     |
| hsa-miR-3192    | TCTGGGAGGTTGTAGCAGTGGA  |
| hsa-miR-32      | TATTGCACACTACTAAGTTGCAT |
| hsa-miR-32      | TATTGCACACTACTAAGTTGCA  |
| hsa-miR-32*     | CAATTTAGTGTGTGTATATT    |
| hsa-miR-320a    | AAAAGCTGGGTTGAGAGGGCGA  |

|              |                         |
|--------------|-------------------------|
| hsa-miR-320a | AAAAGCTGGGTTGAGAGGGCGAA |
| hsa-miR-320a | AAAAGCTGGGTTGAGAGGGCGAT |
| hsa-miR-320a | AAAAGCTGGGTTGAGAGGGCGT  |
| hsa-miR-320a | AAAAGCTGGGTTGAGAGGGCGTT |
| hsa-miR-320a | AAAAGCTGGGTTGAGAGGGCG   |
| hsa-miR-320a | AAAAGCTGGGTTGAGAGGGCGTA |
| hsa-miR-320a | AAAAGCTGGGTTGAGAGGGCGAG |
| hsa-miR-320a | AAAAGCTGGGTTGAGAGGGCGC  |
| hsa-miR-320a | AAAAGCTGGGTTGAGAGGGCGAC |
| hsa-miR-320a | AAAAGCTGGGTTGAGAGGGCGG  |
| hsa-miR-320a | AAAAGCTGGGTTGAGAGGGCGCT |
| hsa-miR-320a | AAAAGCTGGGTTGAGAGGGCGCA |
| hsa-miR-320a | AAAAGCTGGGTTGAGAGGGCGT  |
| hsa-miR-320a | AAAAGCTGGGTTGAGAGGGCGGA |
| hsa-miR-320a | AAAAGCTGGGTTGAGAGGGCGTG |
| hsa-miR-320a | AAAAGCTGGGTTGAGAGGGCGTC |
| hsa-miR-320a | AAAAGCTGGGTTGAGAGGGCGCC |
| hsa-miR-320b | AAAAGCTGGGTTGAGAGGGCAA  |
| hsa-miR-320b | AAAAGCTGGGTTGAGAGGGCAT  |
| hsa-miR-320b | AAAAGCTGGGTTGAGAGGGCA   |
| hsa-miR-320b | AAAAGCTGGGTTGAGAGGGCAA  |
| hsa-miR-320b | AAAAGCTGGGTTGAGAGGGCAAT |
| hsa-miR-320b | AAAAGCTGGGTTGAGAGGGCATT |
| hsa-miR-320b | AAAAGCTGGGTTGAGAGGGCATA |
| hsa-miR-320b | AAAAGCTGGGTTGAGAGGGCAG  |
| hsa-miR-320c | AAAAGCTGGGTTGAGAGGGCGA  |
| hsa-miR-320c | AAAAGCTGGGTTGAGAGGGCGAA |
| hsa-miR-320c | AAAAGCTGGGTTGAGAGGGCGAT |
| hsa-miR-320c | AAAAGCTGGGTTGAGAGGGCGT  |
| hsa-miR-320c | AAAAGCTGGGTTGAGAGGGCGTT |
| hsa-miR-320c | AAAAGCTGGGTTGAGAGGGCG   |
| hsa-miR-320c | AAAAGCTGGGTTGAGAGGGCGTA |
| hsa-miR-320c | AAAAGCTGGGTTGAGAGGGCGAG |
| hsa-miR-320c | AAAAGCTGGGTTGAGAGGGAGA  |
| hsa-miR-320c | AAAAGCTGGGTTGAGAGGGCAA  |
| hsa-miR-320c | AAAAGCTGGGTTGAGAGGGCGC  |
| hsa-miR-320c | AAAAGCTGGGTTGAGAGGGC    |
| hsa-miR-320c | AAAAGCTGGGTTGAGAGGGAGAA |
| hsa-miR-320c | AAAAGCTGGGTTGAGAGGGCGAC |
| hsa-miR-320c | AAAAGCTGGGTTGAGAGGGCAT  |
| hsa-miR-320c | AAAAGCTGGGTTGAGAGGGCGG  |
| hsa-miR-320c | AAAAGCTGGGTTGAGAGGGGA   |
| hsa-miR-320c | AAAAGCTGGGTTGAGAGGGCA   |
| hsa-miR-320c | AAAAGCTGGGTTGAGAGGGCTA  |
| hsa-miR-320c | AAAAGCTGGGTTGAGAGGG     |
| hsa-miR-320c | AAAAGCTGGGTTGAGAGGGAGAT |
| hsa-miR-320c | AAAAGCTGGGTTGAGAGGGTGA  |

|              |                         |
|--------------|-------------------------|
| hsa-miR-320c | AAAAGCTGGGTTGAGAGGGCAAA |
| hsa-miR-320c | AAAAGCTGGGTTGAGAGGGCGCT |
| hsa-miR-320c | AAAAGCTGGGTTGAGAGGGCGCA |
| hsa-miR-320c | AAAAGCTGGGTTGAGAGGGCTAA |
| hsa-miR-320c | AAAAGCTGGGTTGAGAGGGCGGT |
| hsa-miR-320c | AAAAGCTGGGTTGAGAGGGCAAT |
| hsa-miR-320c | AAAAGCTGGGTTGAGAGGGCTAT |
| hsa-miR-320c | AAAAGCTGGGTTGAGAGGGGAA  |
| hsa-miR-320c | AAAAGCTGGGTTGAGAGGGAGT  |
| hsa-miR-320c | AAAAGCTGGGTTGAGAGGGTGAA |
| hsa-miR-320c | AAAAGCTGGGTTGAGAGGGCGGA |
| hsa-miR-320c | AAAAGCTGGGTTGAGAGGGGA   |
| hsa-miR-320c | AAAAGCTGGGTTGAGAGGGCATT |
| hsa-miR-320c | AAAAGCTGGGTTGAGAGGGGGAT |
| hsa-miR-320c | AAAAGCTGGGTTGAGAGGGGCTT |
| hsa-miR-320c | AAAAGCTGGGTTGAGAGGGCGTG |
| hsa-miR-320c | AAAAGCTGGGTTGAGAGGGCGTC |
| hsa-miR-320c | AAAAGCTGGGTTGAGAGGGAAA  |
| hsa-miR-320c | AAAAGCTGGGTTGAGAGGGAA   |
| hsa-miR-320c | AAAAGCTGGGTTGAGAGGGAGTT |
| hsa-miR-320c | AAAAGCTGGGTTGAGAGGGGGT  |
| hsa-miR-320c | AAAAGCTGGGTTGAGAGGGAG   |
| hsa-miR-320c | AAAAGCTGGGTTGAGAGGGTTT  |
| hsa-miR-320c | AAAAGCTGGGTTGAGAGGGTGAT |
| hsa-miR-320c | AAAAGCTGGGTTGAGAGGGTGT  |
| hsa-miR-320c | AAAAGCTGGGTTGAGAGGGAT   |
| hsa-miR-320c | AAAAGCTGGGTTGAGAGGGCCA  |
| hsa-miR-320c | AAAAGCTGGGTTGAGAGGGT    |
| hsa-miR-320c | AAAAGCTGGGTTGAGAGGGCT   |
| hsa-miR-320c | AAAAGCTGGGTTGAGAGGGCATA |
| hsa-miR-320c | AAAAGCTGGGTTGAGAGGGGGTT |
| hsa-miR-320c | AAAAGCTGGGTTGAGAGGGCTTT |
| hsa-miR-320c | AAAAGCTGGGTTGAGAGGGTAA  |
| hsa-miR-320c | AAAAGCTGGGTTGAGAGGGGG   |
| hsa-miR-320c | AAAAGCTGGGTTGAGAGGGTT   |
| hsa-miR-320c | AAAAGCTGGGTTGAGAGGGAGAG |
| hsa-miR-320c | AAAAGCTGGGTTGAGAGGGGAAT |
| hsa-miR-320c | AAAAGCTGGGTTGAGAGGGAGTA |
| hsa-miR-320c | AAAAGCTGGGTTGAGAGGGTTA  |
| hsa-miR-320c | AAAAGCTGGGTTGAGAGGGTGTT |
| hsa-miR-320c | AAAAGCTGGGTTGAGAGGGAAAA |
| hsa-miR-320c | AAAAGCTGGGTTGAGAGGGTTTT |
| hsa-miR-320c | AAAAGCTGGGTTGAGAGGGAGGA |
| hsa-miR-320c | AAAAGCTGGGTTGAGAGGGGCC  |
| hsa-miR-320c | AAAAGCTGGGTTGAGAGGGCAG  |
| hsa-miR-320c | AAAAGCTGGGTTGAGAGGGAGG  |
| hsa-miR-320c | AAAAGCTGGGTTGAGAGGGTG   |

|              |                         |
|--------------|-------------------------|
| hsa-miR-320c | AAAAGCTGGGTTGAGAGGGCTTA |
| hsa-miR-320c | AAAAGCTGGGTTGAGAGGGAGGT |
| hsa-miR-320c | AAAAGCTGGGTTGAGAGGGTTTA |
| hsa-miR-320c | AAAAGCTGGGTTGAGAGGGCCAA |
| hsa-miR-320d | AAAAGCTGGGTTGAGAGGGCGA  |
| hsa-miR-320d | AAAAGCTGGGTTGAGAGGGCGAA |
| hsa-miR-320d | AAAAGCTGGGTTGAGAGGGCGAT |
| hsa-miR-320d | AAAAGCTGGGTTGAGAGGGCGT  |
| hsa-miR-320d | AAAAGCTGGGTTGAGAGGGCGTT |
| hsa-miR-320d | AAAAGCTGGGTTGAGAGGGCG   |
| hsa-miR-320d | AAAAGCTGGGTTGAGAGGGCGTA |
| hsa-miR-320d | AAAAGCTGGGTTGAGAGGGCGAG |
| hsa-miR-320d | AAAAGCTGGGTTGAGAGGGAGA  |
| hsa-miR-320d | AAAAGCTGGGTTGAGAGGGCAA  |
| hsa-miR-320d | AAAAGCTGGGTTGAGAGGGCGC  |
| hsa-miR-320d | AAAAGCTGGGTTGAGAGGGC    |
| hsa-miR-320d | AAAAGCTGGGTTGAGAGGGAGAA |
| hsa-miR-320d | AAAAGCTGGGTTGAGAGGGCGAC |
| hsa-miR-320d | AAAAGCTGGGTTGAGAGGGCAT  |
| hsa-miR-320d | AAAAGCTGGGTTGAGAGGGCGG  |
| hsa-miR-320d | AAAAGCTGGGTTGAGAGGGGGA  |
| hsa-miR-320d | AAAAGCTGGGTTGAGAGGGCGA  |
| hsa-miR-320d | AAAAGCTGGGTTGAGAGGGCA   |
| hsa-miR-320d | AAAAGCTGGGTTGAGAGGGCTA  |
| hsa-miR-320d | AAAAGCTGGGTTGAGAGG      |
| hsa-miR-320d | AAAAGCTGGGTTGAGAGGG     |
| hsa-miR-320d | AAAAGCTGGGTTGAGAGGGAGAT |
| hsa-miR-320d | AAAAGCTGGGTTGAGAGGTCGA  |
| hsa-miR-320d | AAAAGCTGGGTTGAGAGGACGA  |
| hsa-miR-320d | AAAAGCTGGGTTGAGAGGGTGA  |
| hsa-miR-320d | AAAAGCTGGGTTGAGAGGGCAA  |
| hsa-miR-320d | AAAAGCTGGGTTGAGAGGGCGCT |
| hsa-miR-320d | AAAAGCTGGGTTGAGAGGGCGCA |
| hsa-miR-320d | AAAAGCTGGGTTGAGAGGGCTAA |
| hsa-miR-320d | AAAAGCTGGGTTGAGAGGGCGT  |
| hsa-miR-320d | AAAAGCTGGGTTGAGAGGGCAAT |
| hsa-miR-320d | AAAAGCTGGGTTGAGAGGGCTAT |
| hsa-miR-320d | AAAAGCTGGGTTGAGAGGGGAA  |
| hsa-miR-320d | AAAAGCTGGGTTGAGAGGGAGT  |
| hsa-miR-320d | AAAAGCTGGGTTGAGAGGGTGAA |
| hsa-miR-320d | AAAAGCTGGGTTGAGAGGGCGA  |
| hsa-miR-320d | AAAAGCTGGGTTGAGAGGGGA   |
| hsa-miR-320d | AAAAGCTGGGTTGAGAGGCCGAA |
| hsa-miR-320d | AAAAGCTGGGTTGAGAGGGCATT |
| hsa-miR-320d | AAAAGCTGGGTTGAGAGGTCGAA |
| hsa-miR-320d | AAAAGCTGGGTTGAGAGGGGAT  |
| hsa-miR-320d | AAAAGCTGGGTTGAGAGGGCTT  |

|              |                         |
|--------------|-------------------------|
| hsa-miR-320d | AAAAGCTGGGTTGAGAGGGCGTG |
| hsa-miR-320d | AAAAGCTGGGTTGAGAGGGCGTC |
| hsa-miR-320d | AAAAGCTGGGTTGAGAGGGAAA  |
| hsa-miR-320d | AAAAGCTGGGTTGAGAGGACGAA |
| hsa-miR-320d | AAAAGCTGGGTTGAGAGGGAA   |
| hsa-miR-320d | AAAAGCTGGGTTGAGAGGGAGTT |
| hsa-miR-320d | AAAAGCTGGGTTGAGAGGGGGT  |
| hsa-miR-320d | AAAAGCTGGGTTGAGAGGGAG   |
| hsa-miR-320d | AAAAGCTGGGTTGAGAGGGTTT  |
| hsa-miR-320d | AAAAGCTGGGTTGAGAGGGTGAT |
| hsa-miR-320d | AAAAGCTGGGTTGAGAGGTCGAT |
| hsa-miR-320d | AAAAGCTGGGTTGAGAGGCCGAT |
| hsa-miR-320d | AAAAGCTGGGTTGAGAGGGTGT  |
| hsa-miR-320d | AAAAGCTGGGTTGAGAGGACGAT |
| hsa-miR-320d | AAAAGCTGGGTTGAGAGGCCGT  |
| hsa-miR-320d | AAAAGCTGGGTTGAGAGGGAT   |
| hsa-miR-320d | AAAAGCTGGGTTGAGAGGGCCA  |
| hsa-miR-320d | AAAAGCTGGGTTGAGAGGGT    |
| hsa-miR-320d | AAAAGCTGGGTTGAGAGGGCT   |
| hsa-miR-320d | AAAAGCTGGGTTGAGAGGACGT  |
| hsa-miR-320d | AAAAGCTGGGTTGAGAGGGCATA |
| hsa-miR-320d | AAAAGCTGGGTTGAGAGGGCGA  |
| hsa-miR-320d | AAAAGCTGGGTTGAGAGGGGGTT |
| hsa-miR-320d | AAAAGCTGGGTTGAGAGGGCTTT |
| hsa-miR-320d | AAAAGCTGGGTTGAGAGGTCTGT |
| hsa-miR-320d | AAAAGCTGGGTTGAGAGGGTAA  |
| hsa-miR-320d | AAAAGCTGGGTTGAGAGGCCG   |
| hsa-miR-320d | AAAAGCTGGGTTGAGAGGGGG   |
| hsa-miR-320d | AAAAGCTGGGTTGAGAGGGTT   |
| hsa-miR-320d | AAAAGCTGGGTTGAGAGGGAGAG |
| hsa-miR-320d | AAAAGCTGGGTTGAGAGGGCGAA |
| hsa-miR-320d | AAAAGCTGGGTTGAGAGGAA    |
| hsa-miR-320d | AAAAGCTGGGTTGAGAGGTCTA  |
| hsa-miR-320d | AAAAGCTGGGTTGAGAGGGAAT  |
| hsa-miR-320d | AAAAGCTGGGTTGAGAGGGAGTA |
| hsa-miR-320d | AAAAGCTGGGTTGAGAGGGTTA  |
| hsa-miR-320d | AAAAGCTGGGTTGAGAGGGTGT  |
| hsa-miR-320d | AAAAGCTGGGTTGAGAGGGAAAA |
| hsa-miR-320d | AAAAGCTGGGTTGAGAGGGTTTT |
| hsa-miR-320d | AAAAGCTGGGTTGAGAGGAAA   |
| hsa-miR-320d | AAAAGCTGGGTTGAGAGGGAGGA |
| hsa-miR-320d | AAAAGCTGGGTTGAGAGGGCGCC |
| hsa-miR-320d | AAAAGCTGGGTTGAGAGGGCAG  |
| hsa-miR-320d | AAAAGCTGGGTTGAGAGGCCGTT |
| hsa-miR-320d | AAAAGCTGGGTTGAGAGGA     |
| hsa-miR-320d | AAAAGCTGGGTTGAGAGGACGTT |
| hsa-miR-320d | AAAAGCTGGGTTGAGAGGGAGG  |



|                |                         |
|----------------|-------------------------|
| hsa-miR-320d   | AAAAGCTGGGTTGAGAGGACG   |
| hsa-miR-320d   | AAAAGCTGGGTTGAGAGGGTG   |
| hsa-miR-320d   | AAAAGCTGGGTTGAGAGGGCTTA |
| hsa-miR-320d   | AAAAGCTGGGTTGAGAGGCGAT  |
| hsa-miR-320d   | AAAAGCTGGGTTGAGAGGGAGGT |
| hsa-miR-320d   | AAAAGCTGGGTTGAGAGGTTT   |
| hsa-miR-320d   | AAAAGCTGGGTTGAGAGGGTTTA |
| hsa-miR-320d   | AAAAGCTGGGTTGAGAGGGCCAA |
| hsa-miR-324-3p | ACTGCCCCAGGTGCTGCTGGT   |
| hsa-miR-324-3p | ACTGCCCCAGGTGCTGCTGGTA  |
| hsa-miR-324-3p | ACTGCCCCAGGTGCTGCTGGTAA |
| hsa-miR-324-3p | ACTGCCCCAGGTGCTGCTGGTAT |
| hsa-miR-324-3p | ACTGCCCCAGGTGCTGCTGGTT  |
| hsa-miR-324-5p | CGCATCCCCTAGGGCATTGGTGT |
| hsa-miR-324-5p | CGCATCCCCTAGGGCATTGGTG  |
| hsa-miR-324-5p | CGCATCCCCTAGGGCATTGGTGA |
| hsa-miR-328    | CTGGCCCTCTCTGCCCTCCGT   |
| hsa-miR-328    | CTGGCCCTCTCTGCCCTCCGTT  |
| hsa-miR-330-3p | GCAAAGCACACGGCCTGCAGAGA |
| hsa-miR-330-3p | GCAAAGCACACGGCCTGCAGAG  |
| hsa-miR-330-3p | GCAAAGCACACGGCCTGCAGAGT |
| hsa-miR-331-3p | GCCCCTGGGCCTATCCTAGAA   |
| hsa-miR-331-3p | GCCCCTGGGCCTATCCTAGTA   |
| hsa-miR-331-3p | GCCCCTGGGCCTATCCTAGAAA  |
| hsa-miR-331-3p | GCCCCTGGGCCTATCCTAGAAAT |
| hsa-miR-331-3p | GCCCCTGGGCCTATCCTAGAC   |
| hsa-miR-331-3p | GCCCCTGGGCCTATCCTAGAT   |
| hsa-miR-331-3p | GCCCCTGGGCCTATCCTAGACA  |
| hsa-miR-331-3p | GCCCCTGGGCCTATCCTAGACT  |
| hsa-miR-331-3p | GCCCCTGGGCCTATCCTAGAATT |
| hsa-miR-331-3p | GCCCCTGGGCCTATCCTAGAAAA |
| hsa-miR-331-3p | GCCCCTGGGCCTATCCTAGATT  |
| hsa-miR-331-3p | GCCCCTGGGCCTATCCTAGAAAT |
| hsa-miR-335    | TCAAGAGCAATAACGAAAAATG  |
| hsa-miR-335    | TCAAGAGCAATAACGAAAAATGT |
| hsa-miR-339-3p | TGAGCGCCTCGACGACAGAGCCG |
| hsa-miR-339-3p | TGAGCGCCTCGACGACAGAGCC  |
| hsa-miR-339-3p | TGAGCGCCTCGACGACAGAGCCA |
| hsa-miR-339-3p | TGAGCGCCTCGACGACAGAGCCT |
| hsa-miR-339-5p | TCCCTGTCTCCAGGAGCTCACG  |
| hsa-miR-339-5p | TCCCTGTCTCCAGGAGCTCAC   |
| hsa-miR-339-5p | TCCCTGTCTCCAGGAGCTCACA  |
| hsa-miR-33a    | GTGCATTGTAGTTGCATTGCA   |
| hsa-miR-33a    | GTGCATTGTAGTTGCATTGC    |
| hsa-miR-33a    | GTGCATTGTAGTTGCATTGCAA  |
| hsa-miR-33a    | GTGCATTGTAGTTGCATTGCAT  |
| hsa-miR-33a    | GTGCATTGTAGTTGCATTGCAAA |

|                 |                         |
|-----------------|-------------------------|
| hsa-miR-33a*    | CAATGTTCCACAGTGCATCA    |
| hsa-miR-33b     | GTGCATTGCTGTTGCATTGCA   |
| hsa-miR-33b     | GTGCATTGCTGTTGCATTGC    |
| hsa-miR-340     | TTATAAAGCAATGAGACTGATT  |
| hsa-miR-340     | TTATAAAGCAATGAGACTGAT   |
| hsa-miR-340     | TTATAAAGCAATGAGACTGATA  |
| hsa-miR-340     | TTATAAAGCAATGAGACTGATTA |
| hsa-miR-342-3p  | TCTCACACAGAAATCGCACCCGT |
| hsa-miR-342-3p  | TCTCACACAGAAATCGCACCCG  |
| hsa-miR-342-3p  | TCTCACACAGAAATCGCACCCGA |
| hsa-miR-342-3p  | TCTCACACAGAAATCGCACCCGG |
| hsa-miR-342-5p  | AGGGGTGCTATCTGTGATTGAGG |
| hsa-miR-342-5p  | AGGGGTGCTATCTGTGATTGAG  |
| hsa-miR-342-5p  | AGGGGTGCTATCTGTGATTGA   |
| hsa-miR-342-5p  | AGGGGTGCTATCTGTGATTGAGA |
| hsa-miR-345     | GCTGACTCCTAGTCCAGGGCTCA |
| hsa-miR-345     | GCTGACTCCTAGTCCAGGGCT   |
| hsa-miR-345     | GCTGACTCCTAGTCCAGGGCTCT |
| hsa-miR-345     | GCTGACTCCTAGTCCAGGGCTAA |
| hsa-miR-345     | GCTGACTCCTAGTCCAGGGCTA  |
| hsa-miR-345     | GCTGACTCCTAGTCCAGGGCTAT |
| hsa-miR-345     | GCTGACTCCTAGTCCAGGGCTC  |
| hsa-miR-345     | GCTGACTCCTAGTCCAGGGCTT  |
| hsa-miR-345     | GCTGACTCCTAGTCCAGGGCTTT |
| hsa-miR-345     | GCTGACTCCTAGTCCAGGGCTTA |
| hsa-miR-34a     | TGGCAGTGTCTTAGCTGGTTGT  |
| hsa-miR-34a     | TGGCAGTGTCTTAGCTGGTTGT  |
| hsa-miR-34a     | TGGCAGTGTCTTAGCTGGTTG   |
| hsa-miR-34a     | TGGCAGTGTCTTAGCTGGTTGTA |
| hsa-miR-34a*    | CAATCAGCAAGTATACTGCCCTA |
| hsa-miR-34a*    | CAATCAGCAAGTATACTGCCCTT |
| hsa-miR-34a*    | CAATCAGCAAGTATACTGCCCT  |
| hsa-miR-34c-5p  | AGGCAGTGTAGTTAGCTGATTG  |
| hsa-miR-34c-5p  | AGGCAGTGTAGTTAGCTGATTGC |
| hsa-miR-3613-5p | TGTTGTACTTTTTTTTTTGT    |
| hsa-miR-361-3p  | TCCCCAGGTGTGATTCTGATTT  |
| hsa-miR-361-3p  | TCCCCAGGTGTGATTCTGATT   |
| hsa-miR-3614-3p | TAGCCTTCAGATCTTGGTGTTT  |
| hsa-miR-3614-5p | CCACTTGGATCTGAAGGCTGCC  |
| hsa-miR-3615    | TCTCTCGGCTCCTCGGGCT     |
| hsa-miR-3615    | TCTCTCGGCTCCTCGGGCTCG   |
| hsa-miR-3615    | TCTCTCGGCTCCTCGGGCTTT   |
| hsa-miR-3615    | TCTCTCGGCTCCTCGGGCTC    |
| hsa-miR-3615    | TCTCTCGGCTCCTCGGGCTT    |
| hsa-miR-361-5p  | TTATCAGAATCTCCAGGGGTAC  |
| hsa-miR-361-5p  | TTATCAGAATCTCCAGGGGTA   |
| hsa-miR-361-5p  | TTATCAGAATCTCCAGGGGTAT  |

|                 |                         |
|-----------------|-------------------------|
| hsa-miR-361-5p  | TTATCAGAATCTCCAGGGGTAA  |
| hsa-miR-361-5p  | TTATCAGAATCTCCAGGGGTACT |
| hsa-miR-361-5p  | TTATCAGAATCTCCAGGGGTACA |
| hsa-miR-361-5p  | TTATCAGAATCTCCAGGGGTAAA |
| hsa-miR-361-5p  | TTATCAGAATCTCCAGGGGTATA |
| hsa-miR-361-5p  | TTATCAGAATCTCCAGGGGTATT |
| hsa-miR-362-3p  | AACACACCTATTCAAGGATTCA  |
| hsa-miR-362-3p  | AACACACCTATTCAAGGATTC   |
| hsa-miR-362-5p  | AATCCTTGGAACCTAGGTGTGAG |
| hsa-miR-363     | AATTGCACGGTATCCATCTGTGA |
| hsa-miR-363     | AATTGCACGGTATCCATCTGTAA |
| hsa-miR-363     | AATTGCACGGTATCCATCTGT   |
| hsa-miR-363     | AATTGCACGGTATCCATCTGTAT |
| hsa-miR-363     | AATTGCACGGTATCCATCTGTAG |
| hsa-miR-363     | AATTGCACGGTATCCATCTGTTT |
| hsa-miR-363     | AATTGCACGGTATCCATCTGTTT |
| hsa-miR-363     | AATTGCACGGTATCCATCTGTTA |
| hsa-miR-363*    | CGGGTGGATCACGATGCAATTTT |
| hsa-miR-363*    | CGGGTGGATCACGATGCAATTT  |
| hsa-miR-363*    | CGGGTGGATCACGATGCAATT   |
| hsa-miR-365     | TAATGCCCTAAAAATCCTTAT   |
| hsa-miR-365     | TAATGCCCTAAAAATCCTTA    |
| hsa-miR-365     | TAATGCCCTAAAAATCCTTATT  |
| hsa-miR-365     | TAATGCCCTAAAAATCCTTAA   |
| hsa-miR-365     | TAATGCCCTAAAAATCCTTATA  |
| hsa-miR-365     | TAATGCCCTAAAAATCCTTAC   |
| hsa-miR-365     | TAATGCCCTAAAAATCCTTAAA  |
| hsa-miR-365     | TAATGCCCTAAAAATCCTTAG   |
| hsa-miR-3676    | CCGTGTTTCCCCACGCTTT     |
| hsa-miR-3676    | CCGTGTTTCCCCACGCTTTT    |
| hsa-miR-3676    | CCGTGTTTCCCCACGCTT      |
| hsa-miR-3679-5p | TGAGGATATGGCAGGGAAGGGGA |
| hsa-miR-374a    | TTATAATACAACCTGATAAGTG  |
| hsa-miR-374a    | TTATAATACAACCTGATAAGT   |
| hsa-miR-374a    | TTATAATACAACCTGATAAGTGA |
| hsa-miR-374a*   | CTTATCAGATTGTATTGTAATT  |
| hsa-miR-374a*   | CTTATCAGATTGTATTGTAAT   |
| hsa-miR-374a*   | CTTATCAGATTGTATTGTAATTA |
| hsa-miR-374a*   | CTTATCAGATTGTATTGTAATTT |
| hsa-miR-374a*   | CTTATCAGATTGTATTGTAATA  |
| hsa-miR-374b    | ATATAATACAACCTGCTAAGTG  |
| hsa-miR-374b    | ATATAATACAACCTGCTAAGT   |
| hsa-miR-374b    | ATATAATACAACCTGCTAAGTGA |
| hsa-miR-374b    | ATATAATACAACCTGCTAAGTGT |
| hsa-miR-374b    | ATATAATACAACCTGCTAAGTT  |
| hsa-miR-374b*   | CTTAGCAGGTTGTATTATCATT  |
| hsa-miR-374b*   | CTTAGCAGGTTGTATTATCAT   |

|              |                         |
|--------------|-------------------------|
| hsa-miR-375  | TTTGTTCTCGGCTCGCGTGA    |
| hsa-miR-378  | ACTGGACTTGGAGTCAGAAGG   |
| hsa-miR-378  | ACTGGACTTGGAGTCAGAAGGC  |
| hsa-miR-378  | ACTGGACTTGGAGTCAGAAGGCA |
| hsa-miR-378  | ACTGGACTTGGAGTCAGAAG    |
| hsa-miR-378  | ACTGGACTTGGAGTCAGAAGGA  |
| hsa-miR-378  | ACTGGACTTGGAGTCAGAAGGCT |
| hsa-miR-378  | ACTGGACTTGGAGTCAGAAGGAA |
| hsa-miR-378  | ACTGGACTTGGAGTCAGAAGGT  |
| hsa-miR-378  | ACTGGACTTGGAGTCAGAAGA   |
| hsa-miR-378  | ACTGGACTTGGAGTCAGAAGCGC |
| hsa-miR-378  | ACTGGACTTGGAGTCAGAAGAA  |
| hsa-miR-378  | ACTGGACTTGGAGTCAGAAGGTA |
| hsa-miR-378  | ACTGGACTTGGAGTCAGAAGT   |
| hsa-miR-378  | ACTGGACTTGGAGTCAGAAGGAT |
| hsa-miR-378  | ACTGGACTTGGAGTCAGAAGGTT |
| hsa-miR-378  | ACTGGACTTGGAGTCAGAAGGAG |
| hsa-miR-378  | ACTGGACTTGGAGTCAGAAGTC  |
| hsa-miR-378  | ACTGGACTTGGAGTCAGAAGGG  |
| hsa-miR-378  | ACTGGACTTGGAGTCAGAAGAAA |
| hsa-miR-378  | ACTGGACTTGGAGTCAGAAGTCA |
| hsa-miR-378  | ACTGGACTTGGAGTCAGAAGGCC |
| hsa-miR-378  | ACTGGACTTGGAGTCAGAAGGGA |
| hsa-miR-378  | ACTGGACTTGGAGTCAGAAGTA  |
| hsa-miR-378  | ACTGGACTTGGAGTCAGAAGAC  |
| hsa-miR-378  | ACTGGACTTGGAGTCAGAAGGAC |
| hsa-miR-378  | ACTGGACTTGGAGTCAGAAGGTG |
| hsa-miR-378  | ACTGGACTTGGAGTCAGAAGTT  |
| hsa-miR-378  | ACTGGACTTGGAGTCAGAAGCC  |
| hsa-miR-378  | ACTGGACTTGGAGTCAGAAGC   |
| hsa-miR-378  | ACTGGACTTGGAGTCAGAAGTCT |
| hsa-miR-378  | ACTGGACTTGGAGTCAGAAGTAA |
| hsa-miR-378  | ACTGGACTTGGAGTCAGAAGAT  |
| hsa-miR-378  | ACTGGACTTGGAGTCAGAAGGGT |
| hsa-miR-378* | CTCCTGACTCCAGGTCTGTGT   |
| hsa-miR-378b | ACTGGACTTGGAGGCAGAAGG   |
| hsa-miR-378b | ACTGGACTTGGAGGCAGAAGGC  |
| hsa-miR-378b | ACTGGACTTGGAGGCAGAAGGCA |
| hsa-miR-378b | ACTGGACTTGGAGGCAGAAG    |
| hsa-miR-378b | ACTGGACTTGGAGGCAGAAGGA  |
| hsa-miR-378b | ACTGGACTTGGAGGCAGAAGGCT |
| hsa-miR-378b | ACTGGACTTGGAGGCAGAAGGAA |
| hsa-miR-378b | ACTGGACTTGGAGGCAGAAGGT  |
| hsa-miR-378b | ACTGGACTTGGAGGCAGA      |
| hsa-miR-378b | ACTGGACTTGGAGGCAGAAGA   |
| hsa-miR-3917 | GCTCGGACTGAGCAGGTGGG    |
| hsa-miR-3928 | GGAGGAACCTTGGAGCTTCGGCA |

|                |                         |
|----------------|-------------------------|
| hsa-miR-3928   | GGAGGAACCTTGGAGCTTCGGT  |
| hsa-miR-3928   | GGAGGAACCTTGGAGCTTCGGC  |
| hsa-miR-3928   | GGAGGAACCTTGGAGCTTCGG   |
| hsa-miR-3928   | GGAGGAACCTTGGAGCTTCGGCT |
| hsa-miR-3928   | GGAGGAACCTTGGAGCTTCGGTA |
| hsa-miR-3928   | GGAGGAACCTTGGAGCTTCGGA  |
| hsa-miR-3928   | GGAGGAACCTTGGAGCTTCGGTT |
| hsa-miR-3934   | TCAGGTGTGGAACTGAGGCAG   |
| hsa-miR-3934   | TCAGGTGTGGAACTGAGGCA    |
| hsa-miR-3934   | TCAGGTGTGGAACTGAGGCAGG  |
| hsa-miR-3934   | TCAGGTGTGGAACTGAGGCAGA  |
| hsa-miR-3940   | CAGCCCGGATCCAGCCCACT    |
| hsa-miR-421    | ATCAACAGACATTAATTGGGCG  |
| hsa-miR-421    | ATCAACAGACATTAATTGGGCGT |
| hsa-miR-421    | ATCAACAGACATTAATTGGGCGC |
| hsa-miR-421    | ATCAACAGACATTAATTGGGCGA |
| hsa-miR-423-3p | AGCTCGGTCTGAGGCCCTCAGT  |
| hsa-miR-423-3p | AGCTCGGTCTGAGGCCCTCAG   |
| hsa-miR-423-3p | AGCTCGGTCTGAGGCCCTCAGA  |
| hsa-miR-423-3p | AGCTCGGTCTGAGGCCCTCAGC  |
| hsa-miR-423-3p | AGCTCGGTCTGAGGCCCTCAGG  |
| hsa-miR-423-5p | TGAGGGGCAGAGAGCGAGACTT  |
| hsa-miR-423-5p | TGAGGGGCAGAGAGCGAGACTTA |
| hsa-miR-423-5p | TGAGGGGCAGAGAGCGAGACTTG |
| hsa-miR-423-5p | TGAGGGGCAGAGAGCGAGACTTC |
| hsa-miR-424    | CAGCAGCAATTCATGTTTTGA   |
| hsa-miR-424    | CAGCAGCAATTCATGTTTTGAA  |
| hsa-miR-424    | CAGCAGCAATTCATGTTTTGAAA |
| hsa-miR-424    | CAGCAGCAATTCATGTTTTGAAT |
| hsa-miR-424*   | CAAAACGTGAGGCGCTGCTAT   |
| hsa-miR-424*   | CAAAACGTGAGGCGCTGCTATA  |
| hsa-miR-424*   | CAAAACGTGAGGCGCTGCTA    |
| hsa-miR-424*   | CAAAACGTGAGGCGCTGCTAA   |
| hsa-miR-424*   | CAAAACGTGAGGCGCTGCTATAA |
| hsa-miR-424*   | CAAAACGTGAGGCGCTGCTATT  |
| hsa-miR-425    | AATGACACGATCACTCCCGTTGA |
| hsa-miR-425    | AATGACACGATCACTCCCGTTG  |
| hsa-miR-425    | AATGACACGATCACTCCCGTTGT |
| hsa-miR-425*   | ATCGGGAATGTCGTGCCGCC    |
| hsa-miR-4286   | ACCCCACTCCTGGTACCA      |
| hsa-miR-4286   | ACCCCACTCCTGGTACC       |
| hsa-miR-4286   | ACCCCACTCCTGGTACCA      |
| hsa-miR-4286   | ACCCCACTCCTGGTACC       |
| hsa-miR-4286   | ACCCCACTCCTGGTACCAT     |
| hsa-miR-4286   | ACCCCACTCCTGGTACCAA     |
| hsa-miR-4286   | ACCCCACTCCTGGTACAA      |

|              |                          |
|--------------|--------------------------|
| hsa-miR-4286 | ACCCCACTCCTGGTACCATT     |
| hsa-miR-4306 | TGGAGAGAAAGGCAGTTCCTGA   |
| hsa-miR-4306 | TGGAGAGAAAGGCAGTTCCTGAA  |
| hsa-miR-4306 | TGGAGAGAAAGGCAGTTCCTGAT  |
| hsa-miR-4306 | TGGAGAGAAAGGCAGTTCCTG    |
| hsa-miR-4306 | TGGAGAGAAAGGCAGTTCATGA   |
| hsa-miR-4306 | TGGAGAGAAAGGCAGTTCGGGA   |
| hsa-miR-4306 | TGGAGAGAAAGGCAGTTCCTGT   |
| hsa-miR-4306 | TGGAGAGAAAGGCAGTGCCTGA   |
| hsa-miR-4306 | TGGAGAGAAAGGCAGTTACTGA   |
| hsa-miR-4306 | TGGAGAGAAAGGCAGTTCCTGAG  |
| hsa-miR-4306 | TGGAGAGAAAGGCAGTTCCT     |
| hsa-miR-4306 | TGGAGAGAAAGGCAGTTCCTTA   |
| hsa-miR-4306 | TGGAGAGAAAGGCAGTTCATGAA  |
| hsa-miR-4306 | TGGAGAGAAAGGCAGTTTCTGA   |
| hsa-miR-4306 | TGGAGAGAAAGGCAGTTCC      |
| hsa-miR-4306 | TGGAGAGAAAGGCAGTTCGGAA   |
| hsa-miR-4306 | TGGAGAGAAAGGCAGTTCCTGTA  |
| hsa-miR-4306 | TGGAGAGAAAGGCAGTTCCTCGA  |
| hsa-miR-4306 | TGGAGAGAAAGGCAGTTACTGAA  |
| hsa-miR-4306 | TGGAGAGAAAGGCAGTTCCTTAA  |
| hsa-miR-4306 | TGGAGAGAAAGGCAGTGCCTGAA  |
| hsa-miR-4306 | TGGAGAGAAAGGCAGTTGCTGA   |
| hsa-miR-4306 | TGGAGAGAAAGGCAGTTCAGGA   |
| hsa-miR-4306 | TGGAGAGAAAGGCAGTT        |
| hsa-miR-4306 | TGGAGAGAAAGGCAGTTCCTGC   |
| hsa-miR-4306 | TGGAGAGAAAGGCAGTTCCTGAC  |
| hsa-miR-4306 | TGGAGAGAAAGGCAGT         |
| hsa-miR-4306 | TGGAGAGAAAGGCAGTTCATGAT  |
| hsa-miR-4306 | TGGAGAGAAAGGCAGTCCCTGA   |
| hsa-miR-4306 | TGGAGAGAAAGGCAGTTCCTGG   |
| hsa-miR-4306 | TGGAGAGAAAGGCAGTTTATGA   |
| hsa-miR-4306 | TGGAGAGAAAGGCAGTTCCTGGAT |
| hsa-miR-4306 | TGGAGAGAAAGGCAGTTCCTGA   |
| hsa-miR-4306 | TGGAGAGAAAGGCAGTGCCTGAT  |
| hsa-miR-4306 | TGGAGAGAAAGGCAGTTACTGAT  |
| hsa-miR-4306 | TGGAGAGAAAGGCAGTACCTGA   |
| hsa-miR-4306 | TGGAGAGAAAGGCAGTTTCTGAA  |
| hsa-miR-4306 | TGGAGAGAAAGGCAGTTC       |
| hsa-miR-4306 | TGGAGAGAAAGGCAGTTCCTGA   |
| hsa-miR-4306 | TGGAGAGAAAGGCAGTTCCTGTT  |
| hsa-miR-4306 | TGGAGAGAAAGGCAGTTCCTGGAA |
| hsa-miR-4306 | TGGAGAGAAAGGCAGTTGCTGAA  |
| hsa-miR-4306 | TGGAGAGAAAGGCAGTTCCTTAT  |
| hsa-miR-4306 | TGGAGAGAAAGGCAGTTAATGA   |
| hsa-miR-4306 | TGGAGAGAAAGGCAGTTCCTAA   |
| hsa-miR-450a | TTTTGCGATGTGTTCTAATAT    |

|                 |                            |
|-----------------|----------------------------|
| hsa-miR-450b-5p | TTTTGCAATATGTTCTGAAT       |
| hsa-miR-454     | TAGTGCAATATTGCTTATAGGGT    |
| hsa-miR-454*    | ACCCTATCAATATTGTCTCTGT     |
| hsa-miR-484     | TCAGGCTCAGTCCCCTCCCGAT     |
| hsa-miR-484     | TCAGGCTCAGTCCCCTCCCGA      |
| hsa-miR-484     | TCAGGCTCAGTCCCCTCCCGATA    |
| hsa-miR-484     | TCAGGCTCAGTCCCCTCCCGAA     |
| hsa-miR-484     | TCAGGCTCAGTCCCCTCCCGATT    |
| hsa-miR-484     | TCAGGCTCAGTCCCCTCCCGAAA    |
| hsa-miR-486-3p  | CGGGGCAGCTCAGTACAGGAT      |
| hsa-miR-486-3p  | CGGGGCAGCTCAGTACAGGATA     |
| hsa-miR-486-3p  | CGGGGCAGCTCAGTACAGGATT     |
| hsa-miR-486-3p  | CGGGGCAGCTCAGTACAGGA       |
| hsa-miR-486-3p  | CGGGGCAGCTCAGTACAGGATAA    |
| hsa-miR-486-5p  | TCCTGTAAGTACTGAGCTGCCCGAG  |
| hsa-miR-486-5p  | TCCTGTAAGTACTGAGCTGCCCGAGA |
| hsa-miR-486-5p  | TCCTGTAAGTACTGAGCTGCCCGAGT |
| hsa-miR-486-5p  | TCCTGTAAGTACTGAGCTGCCCGA   |
| hsa-miR-486-5p  | TCCTGTAAGTACTGAGCTGCCCGAA  |
| hsa-miR-486-5p  | TCCTGTAAGTACTGAGCTGCCCGAAA |
| hsa-miR-491-5p  | AGTGGGGAACCCCTTCCATGAGGA   |
| hsa-miR-497     | CAGCAGCACACTGTGGTTTGTA     |
| hsa-miR-497     | CAGCAGCACACTGTGGTTTGT      |
| hsa-miR-499-5p  | TTAAGACTTGCAAGTATGTTTA     |
| hsa-miR-499-5p  | TTAAGACTTGCAAGTATGTTT      |
| hsa-miR-500a*   | ATGCACCTGGGCAAGGATTCT      |
| hsa-miR-500a*   | ATGCACCTGGGCAAGGATTCTGA    |
| hsa-miR-500a*   | ATGCACCTGGGCAAGGATTCTG     |
| hsa-miR-501-3p  | AATGCACCCGGGCAAGGATTCT     |
| hsa-miR-501-3p  | AATGCACCCGGGCAAGGATTC      |
| hsa-miR-502-3p  | AATGCACCTGGGCAAGGATTCA     |
| hsa-miR-502-3p  | AATGCACCTGGGCAAGGATTGAG    |
| hsa-miR-502-3p  | AATGCACCTGGGCAAGGATTC      |
| hsa-miR-502-3p  | AATGCACCTGGGCAAGGATTCT     |
| hsa-miR-503     | TAGCAGCGGGAACAGTTCTGCAG    |
| hsa-miR-503     | TAGCAGCGGGAACAGTTCTGCA     |
| hsa-miR-503     | TAGCAGCGGGAACAGTTCTGCAA    |
| hsa-miR-503     | TAGCAGCGGGAACAGTTCTGCAT    |
| hsa-miR-505     | CGTCAACACTTGCTGGTTTCCCT    |
| hsa-miR-505*    | GGGAGCCAGGAAGTATTGATGTT    |
| hsa-miR-505*    | GGGAGCCAGGAAGTATTGATGT     |
| hsa-miR-505*    | GGGAGCCAGGAAGTATTGATG      |
| hsa-miR-532-3p  | CCTCCCACACCAAGGCTTGCA      |
| hsa-miR-532-3p  | CCTCCCACACCAAGGCTTGCAA     |
| hsa-miR-532-3p  | CCTCCCACACCAAGGCTTGC       |
| hsa-miR-532-5p  | CATGCCTTGAGTGTAGGACCGT     |
| hsa-miR-532-5p  | CATGCCTTGAGTGTAGGACCGTA    |

|                 |                         |
|-----------------|-------------------------|
| hsa-miR-532-5p  | CATGCCTTGAGTGTAGGACCG   |
| hsa-miR-532-5p  | CATGCCTTGAGTGTAGGACCGTT |
| hsa-miR-532-5p  | CATGCCTTGAGTGTAGGACCGA  |
| hsa-miR-532-5p  | CATGCCTTGAGTGTAGGACCGG  |
| hsa-miR-542-3p  | TGTGACAGATTGATAACTGAAA  |
| hsa-miR-542-3p  | TGTGACAGATTGATAACTGAA   |
| hsa-miR-542-3p  | TGTGACAGATTGATAACTGAAAA |
| hsa-miR-548a-3p | CAAAACTGGCAATTACTTTTG   |
| hsa-miR-548e    | AAAAACTGAGACTACTTTTGCA  |
| hsa-miR-548e    | AAAAACTGAGACTACTTTTGCAA |
| hsa-miR-548e    | AAAAACTGAGACTACTTTTGTC  |
| hsa-miR-548j    | AAAAGTAATTGCGGTCTTTGGT  |
| hsa-miR-548j    | AAAAGTAATTGCGGTCTTTGGTA |
| hsa-miR-548j    | AAAAGTAATTGCGGTCTTTGG   |
| hsa-miR-548k    | AAAAGTACTTGCGGATTTTGCT  |
| hsa-miR-548l    | AAAAGTATTTGCGGGTTTTGT   |
| hsa-miR-548l    | AAAAGTATTTGCGGGTTTTGTC  |
| hsa-miR-548n    | CAAAGTAATTGTGGATTTTGT   |
| hsa-miR-548o    | CCAAAAGTGCAGTTACTTTTG   |
| hsa-miR-548t    | CAAAGTGATCGTGGTTTTTG    |
| hsa-miR-548t    | CAAAGTGATCGTGGTTTTT     |
| hsa-miR-548u    | CAAAGACTGCAATTACTTTTGCG |
| hsa-miR-548w    | AAAAGTAACTGCGGTTTTTGCC  |
| hsa-miR-551b    | GCGACCCATACTTGTTTTAGT   |
| hsa-miR-551b    | GCGACCCATACTTGTTTTCA    |
| hsa-miR-551b    | GCGACCCATACTTGTTTTAG    |
| hsa-miR-551b*   | GAAATCAAGCGTGGGTGAGACCT |
| hsa-miR-551b*   | GAAATCAAGCGTGGGTGAGAC   |
| hsa-miR-551b*   | GAAATCAAGCGTGGGTGAGACC  |
| hsa-miR-551b*   | GAAATCAAGCGTGGGTGAGACT  |
| hsa-miR-570     | CGAAAACAGCAATTACTTTTG   |
| hsa-miR-574-3p  | CACGCTCATGCACACCCACA    |
| hsa-miR-574-3p  | CACGCTCATGCACACCCAC     |
| hsa-miR-574-5p  | TGAGTGTGTGTGTGTGAGTGTG  |
| hsa-miR-576-3p  | AAGATGTGGAAAAATTGGAAT   |
| hsa-miR-576-3p  | AAGATGTGGAAAAATTGGAATC  |
| hsa-miR-576-3p  | AAGATGTGGAAAAATTGGAATCC |
| hsa-miR-576-5p  | ATTCTAATTTCTCCACGTCTTT  |
| hsa-miR-576-5p  | ATTCTAATTTCTCCACGTCTTTG |
| hsa-miR-576-5p  | ATTCTAATTTCTCCACGTCTT   |
| hsa-miR-582-3p  | TAACTGGTTGAACAACCTGAAC  |
| hsa-miR-582-5p  | TTACAGTTGTTCAACCAGTTACT |
| hsa-miR-589     | TGAGAACCACGTCTGCTCTGA   |
| hsa-miR-589     | TGAGAACCACGTCTGCTCTGAAA |
| hsa-miR-589     | TGAGAACCACGTCTGCTCTGAG  |
| hsa-miR-590-3p  | TAATTTTATGTATAAGCTAGT   |
| hsa-miR-590-3p  | TAATTTTATGTATAAGCTAGTC  |



|                |                         |
|----------------|-------------------------|
| hsa-miR-590-3p | TAATTTTATGTATAAGCTAGTT  |
| hsa-miR-590-5p | GAGCTTATTCATAAAAAGTGCA  |
| hsa-miR-590-5p | GAGCTTATTCATAAAAAGTGCA  |
| hsa-miR-598    | TACGTCATCGTTGTCATCGTCA  |
| hsa-miR-598    | TACGTCATCGTTGTCATCGTC   |
| hsa-miR-598    | TACGTCATCGTTGTCATCGTCAT |
| hsa-miR-598    | TACGTCATCGTTGTCATCGTCAA |
| hsa-miR-598    | TACGTCATCGTTGTCATCGTCT  |
| hsa-miR-618    | AAACTCTACTTGTCTTCTGAGT  |
| hsa-miR-618    | AAACTCTACTTGTCTTCTGAG   |
| hsa-miR-625    | AGGGGGAAAGTTCTATAGTC    |
| hsa-miR-625    | AGGGGGAAAGTTCTATAGTCCT  |
| hsa-miR-625    | AGGGGGAAAGTTCTATAGTCC   |
| hsa-miR-625    | AGGGGGAAAGTTCTATAGTCA   |
| hsa-miR-625    | AGGGGGAAAGTTCTATAGTCCTT |
| hsa-miR-625    | AGGGGGAAAGTTCTATAGTCCTA |
| hsa-miR-625    | AGGGGGAAAGTTCTATAGTCCTG |
| hsa-miR-625    | AGGGGGAAAGTTCTATAGTCT   |
| hsa-miR-625*   | GACTATAGAACTTTCCCCCTCA  |
| hsa-miR-625*   | GACTATAGAACTTTCCCCCTCAA |
| hsa-miR-625*   | GACTATAGAACTTTCCCCCTC   |
| hsa-miR-625*   | GACTATAGAACTTTCCCCCTCT  |
| hsa-miR-625*   | GACTATAGAACTTTCCCCCTCAT |
| hsa-miR-625*   | GACTATAGAACTTTCCCCCTCC  |
| hsa-miR-628-5p | ATGCTGACATATTTACTAGAGG  |
| hsa-miR-629    | TGGGTTTACGTTGGGAGAACT   |
| hsa-miR-629    | TGGGTTTACGTTGGGAGAAC    |
| hsa-miR-629    | TGGGTTTACGTTGGGAGAACTT  |
| hsa-miR-629    | TGGGTTTACGTTGGGAGAACTTA |
| hsa-miR-629*   | GTTCTCCAACGTAAGCCCAGC   |
| hsa-miR-629*   | GTTCTCCAACGTAAGCCCAG    |
| hsa-miR-629*   | GTTCTCCAACGTAAGCCCAGT   |
| hsa-miR-641    | AAAGACATAGGATAGAGTCACTT |
| hsa-miR-642a   | GTCCCTCTCAAATGTGTCTTG   |
| hsa-miR-651    | TTTAGGATAAGCTTGACTTTTG  |
| hsa-miR-651    | TTTAGGATAAGCTTGACTTTT   |
| hsa-miR-651    | TTTAGGATAAGCTTGACTTTTGT |
| hsa-miR-652    | AATGGCGCCACTAGGGTTGTG   |
| hsa-miR-652    | AATGGCGCCACTAGGGTTGT    |
| hsa-miR-652    | AATGGCGCCACTAGGGTTGTG   |
| hsa-miR-652    | AATGGCGCCACTAGGGTTGTGA  |
| hsa-miR-652    | AATGGCGCCACTAGGGTTGTGC  |
| hsa-miR-652    | AATGGCGCCACTAGGGTTGTGTT |
| hsa-miR-660    | TACCCATTGCATATCGGAGTTG  |
| hsa-miR-660    | TACCCATTGCATATCGGAGTTGT |
| hsa-miR-660    | TACCCATTGCATATCGGAGTT   |
| hsa-miR-664    | TATTCATTTATCCCCAGCCTACA |

|                |                         |
|----------------|-------------------------|
| hsa-miR-664    | TATTCATTATCCCCAGCCTAC   |
| hsa-miR-664*   | ACTGGCTAGGGAAAATGATTGGA |
| hsa-miR-671-5p | AGGAAGCCCTGGAGGGGCTGGAG |
| hsa-miR-7      | TGGAAGACTAGTGATTTTGTGT  |
| hsa-miR-7      | TGGAAGACTAGTGATTTTGTG   |
| hsa-miR-7-1*   | CAACAAATCACAGTCTGCCATA  |
| hsa-miR-7-1*   | CAACAAATCACAGTCTGCCAT   |
| hsa-miR-7-1*   | CAACAAATCACAGTCTGCCATT  |
| hsa-miR-7-1*   | CAACAAATCACAGTCTGCCATAA |
| hsa-miR-7-1*   | CAACAAATCACAGTCTGCCATAT |
| hsa-miR-720    | TCTCGCTGGGGCCTCCA       |
| hsa-miR-744    | TGCGGGGCTAGGGCTAACAGCA  |
| hsa-miR-744    | TGCGGGGCTAGGGCTAACAGCAA |
| hsa-miR-744    | TGCGGGGCTAGGGCTAACAGCAT |
| hsa-miR-744    | TGCGGGGCTAGGGCTAACAGC   |
| hsa-miR-744    | TGCGGGGCTAGGGCTAACAGCAG |
| hsa-miR-760    | CGGCTCTGGGTCTGTGGGGAGT  |
| hsa-miR-760    | CGGCTCTGGGTCTGTGGGGAG   |
| hsa-miR-760    | CGGCTCTGGGTCTGTGGGGAGTT |
| hsa-miR-760    | CGGCTCTGGGTCTGTGGGGA    |
| hsa-miR-766    | ACTCCAGCCCCACAGCCTCAG   |
| hsa-miR-766    | ACTCCAGCCCCACAGCCTCAGC  |
| hsa-miR-766    | ACTCCAGCCCCACAGCCTCAGA  |
| hsa-miR-766    | ACTCCAGCCCCACAGCCTCAGT  |
| hsa-miR-766    | ACTCCAGCCCCACAGCCTCAGCA |
| hsa-miR-769-3p | CTGGGATCTCCGGGGTCTTGTT  |
| hsa-miR-769-5p | TGAGACCTCTGGGTCTGAGCT   |
| hsa-miR-769-5p | TGAGACCTCTGGGTCTGAGC    |
| hsa-miR-769-5p | TGAGACCTCTGGGTCTGAGCTA  |
| hsa-miR-874    | CTGCCCTGGCCGAGGGACCGA   |
| hsa-miR-874    | CTGCCCTGGCCGAGGGACCGAC  |
| hsa-miR-874    | CTGCCCTGGCCGAGGGACCGAT  |
| hsa-miR-874    | CTGCCCTGGCCGAGGGACCGAA  |
| hsa-miR-877    | GTAGAGGAGATGGCGCAGGGGAC |
| hsa-miR-877    | GTAGAGGAGATGGCGCAGGGGAA |
| hsa-miR-877    | GTAGAGGAGATGGCGCAGGGGA  |
| hsa-miR-877    | GTAGAGGAGATGGCGCAGGG    |
| hsa-miR-9      | TCTTTGGTTATCTAGCTGTATGA |
| hsa-miR-9      | TCTTTGGTTATCTAGCTGTATGT |
| hsa-miR-9*     | ATAAAGCTAGATAACCGAAAGT  |
| hsa-miR-9*     | ATAAAGCTAGATAACCGAAAGTA |
| hsa-miR-92a    | TATTGCACTTGTCCCGCCTGT   |
| hsa-miR-92a    | TATTGCACTTGTCCCGCCTGTA  |
| hsa-miR-92a    | TATTGCACTTGTCCCGCCTG    |
| hsa-miR-92a    | TATTGCACTTGTCCCGCCTGTT  |
| hsa-miR-92a    | TATTGCACTTGTCCCGCCTGA   |
| hsa-miR-92a    | TATTGCACTTGTCCCGCCTGAA  |

|                |                         |
|----------------|-------------------------|
| hsa-miR-92a    | TATTGCACTTGTCCTGGCCTGG  |
| hsa-miR-92a    | TATTGCACTTGTCCTGGCCTGC  |
| hsa-miR-92a    | TATTGCACTTGTCCTGGCCTGAT |
| hsa-miR-92a    | TATTGCACTTGTCCTGGCCTGGA |
| hsa-miR-92a    | TATTGCACTTGTCCTGGCCTGCA |
| hsa-miR-92a    | TATTGCACTTGTCCTGGCCTGTG |
| hsa-miR-92a    | TATTGCACTTGTCCTGGCCTGTC |
| hsa-miR-92a-1* | AGGTTGGGATCGGTTGCAATGCT |
| hsa-miR-92a-1* | AGGTTGGGATCGGTTGCAATGC  |
| hsa-miR-92a-1* | AGGTTGGGATCGGTTGCAATGCG |
| hsa-miR-92a-1* | AGGTTGGGATCGGTTGCAATGCA |
| hsa-miR-92a-1* | AGGTTGGGATCGGTTGCAATGCC |
| hsa-miR-92a-2* | GGGTGGGGATTTGTTGCATTA   |
| hsa-miR-92a-2* | GGGTGGGGATTTGTTGCATTAC  |
| hsa-miR-92b    | TATTGCACTCGTCCCGCCTC    |
| hsa-miR-92b    | TATTGCACTCGTCCCGCCTCC   |
| hsa-miR-92b    | TATTGCACTCGTCCCGCCTCT   |
| hsa-miR-92b    | TATTGCACTCGTCCCGCCTCA   |
| hsa-miR-92b    | TATTGCACTCGTCCCGCCTCCT  |
| hsa-miR-92b    | TATTGCACTCGTCCCGCCTCCA  |
| hsa-miR-92b    | TATTGCACTCGTCCCGCCTCAA  |
| hsa-miR-92b*   | AGGGACGGGACGCGGTGCAGTG  |
| hsa-miR-92b*   | AGGGACGGGACGCGGTGCAGTG  |
| hsa-miR-92b*   | AGGGACGGGACGCGGTGCAGT   |
| hsa-miR-92b*   | AGGGACGGGACGCGGTGCAGTGA |
| hsa-miR-93     | CAAAGTGCTGTTCTGTCAGGTAG |
| hsa-miR-93     | CAAAGTGCTGTTCTGTCAGGTA  |
| hsa-miR-93     | CAAAGTGCTGTTCTGTCAGGTAA |
| hsa-miR-93     | CAAAGTGCTGTTCTGTCAGGTAT |
| hsa-miR-93*    | ACTGCTGAGCTAGCACTTCCCGA |
| hsa-miR-93*    | ACTGCTGAGCTAGCACTTCCCG  |
| hsa-miR-940    | AAGGCAGGGCCCCGCTCCCCT   |
| hsa-miR-941    | CACCCGGCTGTGTGCACATGTGC |
| hsa-miR-941    | CACCCGGCTGTGTGCACATGTG  |
| hsa-miR-941    | CACCCGGCTGTGTGCACATGTGT |
| hsa-miR-941    | CACCCGGCTGTGTGCACATGTGA |
| hsa-miR-942    | TCTTCTCTGTTTTGGCCATGTG  |
| hsa-miR-942    | TCTTCTCTGTTTTGGCCATGT   |
| hsa-miR-942    | TCTTCTCTGTTTTGGCCATGTGA |
| hsa-miR-944    | AAATTATTGTACATCGGATGAG  |
| hsa-miR-944    | AAATTATTGTACATCGGATGAGA |
| hsa-miR-944    | AAATTATTGTACATCGGATGA   |
| hsa-miR-944    | AAATTATTGTACATCGGATGAGT |
| hsa-miR-95     | TTCAACGGGTATTTATTGAGCA  |
| hsa-miR-98     | TGAGGTAGTAAGTTGTATTGTT  |
| hsa-miR-98     | TGAGGTAGTAAGTTGTATTGT   |
| hsa-miR-98     | TGAGGTAGTAAGTTGTATTGTTA |

|             |                         |
|-------------|-------------------------|
| hsa-miR-98  | TGAGGTAGTAAGTTGTATTGTTT |
| hsa-miR-98  | TGAGGTAGTAAGTTGTATTGTA  |
| hsa-miR-98  | TGAGGTAGTAAGTTGTATTGTTG |
| hsa-miR-99a | AACCCGTAGATCCGATCTTGT   |
| hsa-miR-99a | AACCCGTAGATCCGATCTTGTA  |
| hsa-miR-99a | AACCCGTAGATCCGATCTTGTTG |
| hsa-miR-99b | CACCCGTAGAACCGACCTTGCG  |
| hsa-miR-99b | CACCCGTAGAACCGACCTTGCGA |
| hsa-miR-99b | CACCCGTAGAACCGACCTTGC   |
| hsa-miR-99b | CACCCGTAGAACCGACCTTGCGT |
