# Supplementary material for: Comprehensive microRNA profiling in B-cells of human centenarians by massively parallel sequencing
Source: PubMed Central journal article supplement (PMC3563618; doi:10.1186/1471-2164-13-353), 2012-07-31
Supplement: 1471-2164-13-353-S4.pdf [file 1471-2164-13-353-S4.pdf]

**Table S4: Putative and Confirmed Targets of differentially expressed miRNAs**

| miRNA        | Targets                                                                                                                                                                                                                                                                                                                                                                                                                                                                                                                                                                                                                                                                                                                                                                                                             |
|--------------|---------------------------------------------------------------------------------------------------------------------------------------------------------------------------------------------------------------------------------------------------------------------------------------------------------------------------------------------------------------------------------------------------------------------------------------------------------------------------------------------------------------------------------------------------------------------------------------------------------------------------------------------------------------------------------------------------------------------------------------------------------------------------------------------------------------------|
| hsa-miR-122  | GIT1, CLIC4, GYS1, FKBP5, SOX11, CYCLING1*, BCL-W*, ADAM17*, SLC7A1*, AKT3*, NUMBL*, FOXJ3*, XPO6*, AP3M2*, G6PC3*, GALNT10*, RIPK5*, TPD52L2*, FUNDC2*, MAPK11*, ALS2CR13*, BACH2*, ATP11A*, ATP1A2*, DUSP2*, OSMR*, RABIF*, PALM*, AACs*, TBX19*, UBAP2*, EGLN3*, NCAM1*, MeCP2*, CS*, FOXP1*, RAB11FIP1*, RAB6B*, TRIB1*, TTYH3*, ALDOA*, ANXA11*, CLDN18*, ENTPD4*, NFATC2IP*, ANK2*, MEP1A*, NFATC1*, SLC7A11*                                                                                                                                                                                                                                                                                                                                                                                                 |
| hsa-miR-20b  | MYT1L, BCL11B, CAMTA1, FAM102A, ZBTB7A, ANKRD52, KIAA0494, EPHA4, ARHGAP12, GLIS3, ZC3H12C, AKAP11, C11orf30, FBXW11, NR4A3, PRRG1, ZC3H7B, ZNFX1, LDLR, RUNX3, SLC46A3, FAT2, XRR1, PTPRD, M6PR, ITGB8, VLDLR, PKD2, MKRN1, CHD9, RAB5B, SR140, EZH1, TBL1X, CLIP4, PURB, STAT3, NAPEPLD, PFN2, TET3, MAP3K14, KIAA0513, MTMR3, KLHL28, MFAP3L, USP31, GPR6, ZBTB4, UBFD1, FCHO2, ATXN1, FRS2, E2F1, PKNOX1, TP53INP1, NBEA, TBC1D20, KLF12, ARID4A, CCND1, SLITRK3, CDKN1A, NPAS2, GPR137C, PDGFRA, UNK, OTUD4, ZFYVE26, SLC40A1, BTBD7, PLEKHA3, DPYSL5, VANGL1, BCL2L2, ZBTB41, NTRK2, RBL2, MKL2, TXNIP, NCOA3, ZFP91, KPNA3, ANKIB1, ENPP5, C5orf41, RPS6KA2, WDR37, NPAT, TXLNA, MAP3K2, BMPR2, SERP1, C2CD2, CRAMP1L, ANKFY1, RUFY2, FURIN, ZNF512B, ANKRD29, TBC1D9, FYCO1, ESR1*                          |
| hsa-miR-454  | C10orf140, RNF38, LDLR, PTEN, TBL1XR1, MIER1, C7orf60, MYBL1, TSC1, SBF2, DDX6, FBXO28, WNT1, SULF1, DICER1, PIGA, ACSL4, RNF41, PAN3, MAF, DENND4C, CPEB4, EREG, CREB5, MBNL1, CPEB2, ACVR1, MYT1L, MXD1, ZFPM2, EPS15, C1orf144, WDR20, PGM2L1, SOS2, BACH2, ZBTB4, ARL6IP1, HBP1, EPC2, CPEB1, MLLT6, EIF2C1, MTMR9, NPTX1, CUL3, PIK3C2A, IGF1, SHANK2, FAM104A, ENPP5, EIF2C4, BRWD1, FAM178A, CHST1, ZNF217, JARID2                                                                                                                                                                                                                                                                                                                                                                                           |
| hsa-miR-99b  | BAZ2A                                                                                                                                                                                                                                                                                                                                                                                                                                                                                                                                                                                                                                                                                                                                                                                                               |
| hsa-miR-363  | CPEB3, SLC12A5, RBM47, PIK3R3, CD69, EIF4G2, SH3PXD2A, CSMD3, PCDH11X, NFIB, FNDC3B, RNF38, GRIA1, BSN, BCL2L11, MYO1B, RAB23, B3GALT2, TEAD1, NSF, RAP1B, NFIX, MTF1, FBXW7, MSRB3, CPEB4, GIT2, SYN2, CPEB2, IRS2, CSMD1, LIN54, MAP2K4, REV3L, ANKRD13C, MARK1, TULP4, BTG2, PMEPA1, PITPNM2, LHFPL2, TTC9, ADAM10, MEF2D, KLHL14, ARMC1, SERTAD2, PCDH7, KIAA0831, FNIP1, GATAD2B, RAG1, MAN2A1, SLC6A1                                                                                                                                                                                                                                                                                                                                                                                                         |
| hsa-miR-148a | MTF1, C1orf144, MTMR9, MITF, WNT1, SERBP1, MGAT4A, ATP11A, TGIF2, BCL2L11, SYNJ1, C18orf25, MLL, KIAA0232, CPEB4, ZDHHC7, ATP6AP2, MXD1, EPS15, MIER1, PTEN, NPTN, RICTOR, PPP1R10, MEOX2, ITGA5, B4GALT5, OSBPL11, TXNIP, C5orf30, SNN, SLC24A3, PXR*, DNMT3B1*, DNMT3B3*, DNMT-1*                                                                                                                                                                                                                                                                                                                                                                                                                                                                                                                                 |
| hsa-miR-181  | DDX3X, TNPO1, FOXP1, CPEB4, ZNF440, TRIM2, FIGN, ATP2B1, HSPC159, SLAIN2, ATP2B2, DLGAP2, GIGYF1, BTBD3, ADAM11, KIAA0528, LARP4, CTDSPL, ZNF594, PITPNB, MBOAT2, OSBPL3, EPB41, PLDN, MLL3, ROD1, CLASP1, HIC2, KRAS, ITGB8, ITSN1, TIMP3, RAP1B, BRWD1, BCL2, KPNB1, SSX2IP, ZADH2, BCLAF1, GPD1L, TMEM132D, SENP1, PDE5A, PHACTR4, PCDHA13, PCDHA11, TMCC1, ENTPD6, ZBTB4, PCDHA3, ZFP14, KIF3B, ATXN1, DDX3Y, PAPD5, PCDHA1, PLAG1, PPP1R3B, PKNOX2, SS18L1, PCDHA5, DERL1, PCDHAC1, SPRY4, HOXC8, SLC2A3, PDGFRA, CUL3, ST8SIA4, KPNA4, SIPA1L2, KIAA2022, KIAA0195, CBX7, PCDHA2, C7orf41, FBXO34, ARSJ, C5orf41, TGFBRAP1, PCDHA6, GNB4, ADO, PCDHAC2, ADAMTS6, PCDHA8, SLITRK1, C11orf41, SERTAD2, RCOR1, NPTXR, BIRC6, RLF, PCDHA12, ADCY9, NOVA1, LIN28B, PCDHA10, CTTNBP2NL, PCDHA4, IPO5, PCDHA7, MAPK1 |

|                |                                                                                                                                                                                                                                                                                                                                                                                                                                                                                                                                          |
|----------------|------------------------------------------------------------------------------------------------------------------------------------------------------------------------------------------------------------------------------------------------------------------------------------------------------------------------------------------------------------------------------------------------------------------------------------------------------------------------------------------------------------------------------------------|
| hsa-miR-192    | PABPC4, DHFR*                                                                                                                                                                                                                                                                                                                                                                                                                                                                                                                            |
| hsa-miR-361-5p | SP1, RPA1                                                                                                                                                                                                                                                                                                                                                                                                                                                                                                                                |
| hsa-miR-9      | HIC2, LDLRAP1, ZBTB41, SHROOM4, PRDM1, MAP3K3, SCUBE3, ALCAM, TNC, LSM14A, BAHD1, ROD1, SLC12A5, HN1L, CPEB3, PCGF5, FOXP1, FRMD6, CPEB4, CPEB2, GABRB2, FBN1, AP1S2, PI4K2A, ARFGF2, PHLDB2, PHF20L1, SMARCE1, NOX4, LZTS2, ZBTB39, SPTLC2, SHC1, MMP16, TMTC1, SMURF1, TNKS, KIAA0240, CEP350, COG3, RAG1AP1, FOXP4, GOT1, RAB34, KCNJ2, LPHN1, SOCS5, CSDA, ZKSCAN1, MDGA1, MKL2, FIGNL2, STARD13, UBE3C, SLC31A2, MTHFD2, SFXN2, PRRX1, MEGF10, ONECUT1, ELAVL1, LIN28B, DIAPH2, trkC*, BACE1*, PRDM1*, REST*, NFKB1*, FOXO1*, CDH1* |

**\*Experimentally Confirmed Targets in Literature and reported by miRecords. [1-4]**

1. Braconi C, Huang N, Patel T: **MicroRNA-dependent regulation of DNA methyltransferase-1 and tumor suppressor gene expression by interleukin-6 in human malignant cholangiocytes.** *Hepatology* 2010, **51**(3):881-890.
2. Tili E, Michaille JJ, Cimino A, Costinean S, Dumitru CD, Adair B, Fabbri M, Alder H, Liu CG, Calin GA *et al*: **Modulation of miR-155 and miR-125b levels following lipopolysaccharide/TNF-alpha stimulation and their possible roles in regulating the response to endotoxin shock.** *J Immunol* 2007, **179**(8):5082-5089.
3. Tsai WC, Hsu PW, Lai TC, Chau GY, Lin CW, Chen CM, Lin CD, Liao YL, Wang JL, Chau YP *et al*: **MicroRNA-122, a tumor suppressor microRNA that regulates intrahepatic metastasis of hepatocellular carcinoma.** *Hepatology* 2009, **49**(5):1571-1582.
4. Xiao F, Zuo Z, Cai G, Kang S, Gao X, Li T: **miRecords: an integrated resource for microRNA-target interactions.** *Nucleic Acids Research* 2009, **37**:D105-D110.
