# Supplementary material for: Comprehensive microRNA profiling in B-cells of human centenarians by massively parallel sequencing
Source: PubMed Central journal article supplement (PMC3563618; doi:10.1186/1471-2164-13-353), 2012-07-31
Supplement: 1471-2164-13-353-S5.pdf [file 1471-2164-13-353-S5.pdf]

**Supplementary Table S5: Significantly over-represented GO categories of predicted targets of miRNA differentially expressed in B-Cells of Centenarians as compared to Controls**

| GO TERM                                                                                      | GO ID      | Genes Found | Total Genes in Set | p-Value  |
|----------------------------------------------------------------------------------------------|------------|-------------|--------------------|----------|
| nervous system development                                                                   | GO:0007399 | 39          | 716                | 3.92E-28 |
| developmental process                                                                        | GO:0032502 | 94          | 3347               | 1.16E-23 |
| multicellular organismal development#system development                                      | GO:0048731 | 59          | 1605               | 1.16E-23 |
| anatomical structure development                                                             | GO:0048856 | 67          | 2005               | 5.65E-23 |
| cellular process#regulation of cellular process                                              | GO:0050794 | 131         | 5704               | 2.19E-22 |
| multicellular organismal development                                                         | GO:0007275 | 72          | 2299               | 3.79E-22 |
| regulation of biological process                                                             | GO:0050789 | 137         | 6140               | 3.79E-22 |
| biological regulation                                                                        | GO:0065007 | 145         | 6731               | 9.00E-22 |
| metabolic process#regulation of metabolic process                                            | GO:0019222 | 99          | 4150               | 1.04E-17 |
| negative regulation of cellular process                                                      | GO:0048523 | 42          | 1137               | 8.15E-17 |
| regulation of cellular metabolic process                                                     | GO:0031323 | 94          | 3933               | 8.15E-17 |
| gene expression#regulation of gene expression                                                | GO:0010468 | 91          | 3833               | 5.92E-16 |
| negative regulation of biological process                                                    | GO:0048519 | 42          | 1182               | 8.95E-16 |
| multicellular organismal process                                                             | GO:0032501 | 89          | 3822               | 7.24E-15 |
| regulation of nucleobase, nucleoside, nucleotide and nucleic acid metabolic process          | GO:0019219 | 85          | 3713               | 1.66E-13 |
| regulation of transcription, DNA-dependent                                                   | GO:0006355 | 79          | 3358               | 2.50E-13 |
| transcription, DNA-dependent                                                                 | GO:0006351 | 80          | 3439               | 3.61E-13 |
| RNA biosynthetic process                                                                     | GO:0032774 | 80          | 3444               | 3.82E-13 |
| RNA metabolic process                                                                        | GO:0016070 | 91          | 4155               | 4.13E-13 |
| regulation of transcription                                                                  | GO:0045449 | 83          | 3654               | 5.42E-13 |
| biopolymer metabolic process                                                                 | GO:0043283 | 142         | 7940               | 2.64E-12 |
| transcription                                                                                | GO:0006350 | 84          | 3803               | 2.86E-12 |
| cellular developmental process                                                               | GO:0048869 | 47          | 1810               | 1.52E-09 |
| cell differentiation                                                                         | GO:0030154 | 47          | 1810               | 1.52E-09 |
| homophilic cell adhesion                                                                     | GO:0007156 | 17          | 206                | 2.93E-09 |
| nucleobase, nucleoside, nucleotide and nucleic acid metabolic process                        | GO:0006139 | 106         | 5848               | 6.69E-09 |
| positive regulation of biological process                                                    | GO:0048518 | 31          | 1062               | 7.54E-08 |
| gene expression                                                                              | GO:0010467 | 98          | 5454               | 7.57E-08 |
| macromolecule metabolic process                                                              | GO:0043170 | 167         | 11144              | 1.77E-07 |
| cell-cell adhesion                                                                           | GO:0016337 | 19          | 347                | 1.91E-07 |
| cellular component organization and biogenesis                                               | GO:0016043 | 66          | 3277               | 3.36E-07 |
| positive regulation of cellular process                                                      | GO:0048522 | 28          | 954                | 3.68E-07 |
| enzyme linked receptor protein signaling pathway                                             | GO:0007167 | 17          | 300                | 6.84E-07 |
| transcription from RNA polymerase II promoter                                                | GO:0006366 | 21          | 640                | 1.46E-06 |
| primary metabolic process                                                                    | GO:0044238 | 181         | 12764              | 2.40E-06 |
| biological adhesion                                                                          | GO:0022610 | 27          | 960                | 2.51E-06 |
| cell adhesion                                                                                | GO:0007155 | 27          | 960                | 2.51E-06 |
| negative regulation of cellular metabolic process                                            | GO:0031324 | 18          | 381                | 3.60E-06 |
| cellular metabolic process                                                                   | GO:0044237 | 179         | 12668              | 3.82E-06 |
| negative regulation of metabolic process                                                     | GO:0009892 | 19          | 436                | 5.31E-06 |
| cell-cell signaling                                                                          | GO:0007267 | 20          | 640                | 1.05E-05 |
| neurological system process#transmission of nerve impulse                                    | GO:0019226 | 16          | 330                | 1.17E-05 |
| cell differentiation#cell development                                                        | GO:0048468 | 31          | 1242               | 1.20E-05 |
| cell cycle process                                                                           | GO:0022402 | 19          | 625                | 4.06E-05 |
| transmembrane receptor protein tyrosine kinase signaling pathway                             | GO:0007169 | 12          | 210                | 5.73E-05 |
| neurological system process#transmission of nerve impulse#synaptic transmission              | GO:0007268 | 14          | 290                | 5.94E-05 |
| negative regulation of transcription                                                         | GO:0016481 | 14          | 291                | 6.06E-05 |
| cell proliferation                                                                           | GO:0008283 | 21          | 745                | 6.66E-05 |
| regulation of signal transduction                                                            | GO:0009966 | 22          | 800                | 6.76E-05 |
| multicellular organismal development#system development#organ development                    | GO:0048513 | 28          | 1141               | 6.76E-05 |
| cell communication                                                                           | GO:0007154 | 90          | 5560               | 7.68E-05 |
| negative regulation of nucleobase, nucleoside, nucleotide and nucleic acid metabolic process | GO:0045934 | 14          | 319                | 0.000154 |
| nervous system development#central nervous system development                                | GO:0007417 | 12          | 235                | 0.000154 |
| negative regulation of transcription, DNA-dependent                                          | GO:0045892 | 11          | 203                | 0.000209 |
| intracellular signaling cascade                                                              | GO:0007242 | 40          | 1965               | 0.000216 |
| protein kinase cascade                                                                       | GO:0007243 | 15          | 376                | 0.000216 |
| anatomical structure morphogenesis                                                           | GO:0009653 | 25          | 1047               | 0.000437 |
| regulation of progression through cell cycle                                                 | GO:0000074 | 14          | 353                | 0.000437 |
| negative regulation of progression through cell cycle                                        | GO:0045786 | 11          | 225                | 0.000499 |
| regulation of cell cycle                                                                     | GO:0051726 | 14          | 359                | 0.000509 |
| striated muscle development                                                                  | GO:0014706 | 7           | 88                 | 0.000705 |
| multicellular organismal development#embryonic development                                   | GO:0009790 | 11          | 235                | 0.000707 |
| cell cycle                                                                                   | GO:0007049 | 21          | 839                | 0.000802 |
